## RESEARCH ARTICLE

# Climate change and spatio-temporal trend analysis of climate extremes in the homogeneous climatic zones of Pakistan during 1962–2019

Firdos Khan<sup>1</sup>, Shaukat Ali<sup>2\*</sup>, Christoph Mayer<sup>3</sup>, Hamd Ullah<sup>4</sup>, Sher Muhammad<sup>5</sup>

**1** School of Natural Sciences (SNS), National University of Sciences and Technology (NUST), Islamabad, Pakistan, **2** Global Change Impact Studies Centre (GCISC), Ministry of Climate Change, Islamabad, Pakistan, **3** Geodesy and Glaciology (KEG), Bavarian Academy of Sciences and Humanities, Munich, Germany, **4** Department of Mathematics and Statistics, International Islamic University, Islamabad, Pakistan, **5** International Centre for Integrated Mountains Development, Kathmandu, Nepal

\* [pirshauki@gmail.com](mailto:pirshauki@gmail.com)

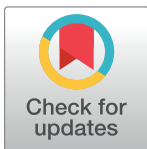

## OPEN ACCESS

**Citation:** Khan F, Ali S, Mayer C, Ullah H, Muhammad S (2022) Climate change and spatio-temporal trend analysis of climate extremes in the homogeneous climatic zones of Pakistan during 1962–2019. *PLoS ONE* 17(7): e0271626. <https://doi.org/10.1371/journal.pone.0271626>

**Editor:** Shamsuddin Shahid, Universiti Teknologi Malaysia, MALAYSIA

**Received:** February 11, 2022

**Accepted:** July 5, 2022

**Published:** July 27, 2022

**Copyright:** © 2022 Khan et al. This is an open access article distributed under the terms of the [Creative Commons Attribution License](https://creativecommons.org/licenses/by/4.0/), which permits unrestricted use, distribution, and reproduction in any medium, provided the original author and source are credited.

**Data Availability Statement:** All relevant data are within the paper and its [Supporting Information](#) files.

**Funding:** This work is supported by the project of Asia-Pacific Network for Global Change Research (APN) titled “Towards robust projections of climate extremes and adaptation plans over South Asia: CRRP2018-04MY-Ali” <https://www.apn-gcr.org/project/towards-robust-projections-of-climate-extremes-and-adaptation-plans-over-south-asia/>.

## Abstract

Climate extremes, such as heat waves, droughts, extreme rainfall can lead to harvest failures, flooding and consequently threaten the food security worldwide. Improving our understanding about climate extremes can mitigate the worst impacts of climate change and extremes. The objective here is to investigate the changes in climate and climate extremes by considering two time slices (i.e., 1962–1990 and 1991–2019) in all climate zones of Pakistan by utilizing observed data from 54 meteorological stations. Different statistical methods and techniques were applied on observed station data to assess changes in temperature, precipitation and spatio-temporal trends of climatic extremes over Pakistan from 1962 to 2019. The Mann-Kendal test demonstrated increasing precipitation (DJF) and decreasing maximum and minimum temperatures (JJA) at the meteorological stations located in the Karakoram region during 1962–1990. The decadal analysis, on the other hand, showed a decrease in precipitation during 1991–2019 and an increase in temperature (maximum and minimum) during 2010–2019, which is consistent with the recently observed slight mass loss of glaciers related to the Karakoram Anomaly. These changes are highly significant at 5% level of significance at most of the stations. In case of temperature extremes, summer days (SU25) increased except in zone 4, TX10p (cold days) decreased across the country during 1962–1990, except for zones 1 and 2. TX90p (warm days) increased between 1991–2019, with the exception of zone 5, and decreased during 1962–1990, with the exception of zones 2 and 5. The spatio-temporal trend of consecutive dry days (CDD) indicated a rising tendency from 1991 to 2019, with the exception of zone 4, which showed a decreasing trend. PRCPTOT (annual total wet-day precipitation), R10 (number of heavy precipitation days), R20 (number of very heavy precipitation days), and R25mm (very heavy precipitation days) increased (decreased) considerably in the North Pakistan during 1962–1990 (1991–2019). The findings of this study can help to address some of the sustainable development goals related climate action, hunger and environment. In addition, the findings can help in developing sustainable adaptation and mitigation strategies against climate change and

**Competing interests:** The authors have declared that no competing interests exist.

extremes. As the climate and extremes conditions are not the uniform in all climate zone, therefore, it is suggested to the farmers and agriculture department to harvest crops resilient to the climatic condition of each zone. Temperature has increasing trend in the northern Pakistan, therefore, the concerned stakeholders need to make rational plans for higher river flow/flood situation due to snow and glacier melt.

## 1. Introduction

Climate change has been attributed to human-caused activities, especially increased greenhouse gases emissions after the mid-twentieth century [1–4]. Climate change is causing a number of threats, including an increase in the frequency of extreme events and other disasters [5,6]. Evidence of observed changes in extremes such as heavy precipitation, heatwaves, tropical cyclones, and droughts, and, in particular, the attribution of these extremes to human influence, has strengthened since AR5 (Fifth Assessment Report) [6]. The societal infrastructure is becoming more vulnerable to climate extremes, which are exacerbated by climate change [7–9]. Climate extremes such as droughts, floods, heatwaves, and typhoons have geographically different economic, health, social, ecological, and environmental impacts [10–15].

Many approaches have been developed to explore variability and trends of climate extremes using observed precipitation and temperature data around the world. For example, Grima et al. [16] investigated the variability of temperature and precipitation in the Upper Huai River Basin of China using yearly time series data from 1960 to 2016, concluded a decreasing trend in precipitation and a considerably increasing trend in temperature at all meteorological stations. Bougara et al. [17] investigated the variability of rainfall in the Tafna basin in northeastern Algeria using observed data from 1979 to 2011, resulted in heterogeneous results in different stations. Asfaw et al. [18] performed variability and trend analyses of temperature using data from 1901 to 2014 in the Woleka sub-basin in northcentral Ethiopia and found a significant increasing trend in mean and minimum average temperatures. Other studies that are based on observe station data on variability and trend analysis of temperature and precipitation in various regions of the globe include: [19–24].

Most of the studies conducted in Pakistan considered a sub-region of Pakistan for their analyses [25–29]. For instance, Alam et al. [25] considered three meteorological stations in the north-western part (Khyber Pakhtoonkhwa province) and used Mann Kendall (MK) test for trend analysis using daily observed data for the duration of 1960–2020. Safdar et al. [27] investigated the climate change indicators and spatio-temporal shift in Monsoon pattern by using observed data for the duration of 1980–2017. They concluded a warming tendency and a decrease in the rainfall in the Monsoon region of Pakistan. Hussain et al. [26] investigated variability and trends in precipitation and temperature over the northern part of Pakistan by using observed meteorological data (duration of 1955–2016 for some station and 1995–2012 for other stations). They concluded elevation-dependent conclusions in the target location, for instance, they noted increasing trend in maximum temperature and precipitation at station with elevation 1500–2800 meters in contrast to elevation less than 1500 meters during 1955–2016. Further studies which investigated variability and trends analysis in the sub-regions of the country include [28–30].

Studies related to precipitation and temperatures' extremes in different parts of the world revealed that these extremes are increased in terms of frequency, intensity and persistence [31–33]. The study of Sun et al. [33] concluded that the extreme precipitation has increased at two-

third stations globally during 1950–2018. Frich et al. [34] investigated about the possible changes in climate extreme over the whole globe using observed data for the duration of 1946–1999. They noted a significant increase and a decrease in the number of warm summer nights and the number of frost days, respectively, and a significant increase in heavy precipitation events.

Sheikh et al. [35] derived climate extremes for temperature (for the duration of 1971–2000) and precipitation (for the duration of 1961–2000) using observed data over Pakistan, India, Bangladesh, Nepal and Sri Lanka. Their results indicate an increase in precipitation extremes in South Asia, consistent with the global average. Rizvi et al. [36] investigated temperature and precipitation extreme at four meteorological stations (Islamabad, Muree, Jhelum and Mianwali) using observed data for the duration of 1960–2013. Their findings concluded that most of the temperature extremes have positive trend except FDO at Islamabad and Jhelum stations.

Glaciers play significant role in terms of water availability in the mountainous regions in the world [37,38]. Most of the mountain glaciers worldwide are losing mass [39,40]. In contrast, Glaciers in the Karakoram and adjacent Kunlun Shan seem to be stable or even growing in the recent past [41–43]. The glaciers stability is consistent with temperature trends in the Upper Indus Basin (UIB) between 1961 and 2000, investigated by Fowler et al. [44], indicating decreasing summer temperatures and runoff. These studies used somehow outdated climate data till 2000 and call for updated investigation. With the recently recorded climate data, it can update the recent trends and potentially explain the Karakoram anomaly. In addition, spatio-temporal trend analysis of precipitation and temperature extremes can provide information about the frequency, intensity and duration of extremes events like floods, heatwaves and droughts etc. Towards this end, a special section is presented to investigate climate change and significance of the temperature and precipitation extremes at each meteorological station in the northern part of Pakistan.

Various studies conducted recently explored a relationship between heatwaves, high-temperature extremes, and population exposure during the 21<sup>st</sup> Century. For instance, Iyakaremye et al. [45] concluded that by the mid of 21<sup>st</sup> century, the population exposure is expected to increase by ~ 28% (25%) in comparison to the baseline duration under SSP5-8.5 (SSP2-4.5) in Africa. Many parts of Africa have experienced intensified and more frequent hot days and nights recently which clearly indicates a shift in the African climate [46]. Projected results about precipitation suggested uncertainties over Pakistan [47,48], however, some studies suggested that precipitation has mixed trend (decreasing trend for some time periods and increasing trend for other time periods) over the northern Pakistan in the future. This demonstrates that it is imperative to understand better the condition of climate change and extremes, particularly in the UIB as it will have impacts on water availability, hydropower generation, agriculture and the livelihood of inhabitants downstream. In addition, this can assist policy makers in terms of planning for better mitigation and adaptation measures in the future.

A different approach is adapted in contrast to the previous studies to investigate climate change signals and climate extremes' analysis over Pakistan for the duration of 1962–2019 (making two time slices, i.e., 1962–1990 and 1991–2019). Initially, the change in the mean values for precipitation and temperature between two-time slices is tested for possible significance separately. The spatio-temporal trend analysis of climate extremes is then performed zone wise for each time duration. A comparison is made between the two time periods to see the possible changes in climate change and climate extremes. The assessment is drawn by using various statistical techniques, e.g., probability density functions, spatio-temporal trend analysis and testing the significance of climate extremes.

The major aims of this study are: (1) to test the significance of changing climate in two-time durations for each climate zone in Pakistan and each station in the HKH (Hindukush-Karakoram-Himalaya) region; (2) spatio-temporal trend analysis of climate extremes in each climate

zone and for each station in the HKH region. Moreover, the results of this study may help to address some of the Sustainable Development Goals (SDGs) of the United Nation Development Programme (UNDP) related to climate action, water, hunger and environment. The remaining paper is structured as: section 2 is for study area and data; section 3 presents the methodology; section 4 consists of results; section 5 is reserved for discussion and section 6 presents conclusions about this study.

## 2. Study area and data

The target location of this study is Pakistan which has 881,913 square kilometers area and approximately 222 million inhabitants [49–51]. Pakistan lies in the northern hemisphere with latitude of 23.4–37.3N and longitude of 60.5–78.5E. It has a diversity in climate as it has Arabian Sea in the south and the world's highest mountains (Himalaya, Hindukush and Karakoram) in the north. The country has four climate seasons (Winter = December–February (DJF), Spring = March–May (MAM), Summer = June–August (JJA), Autumn = September–November (SON)) and consequently significant spatial and temporal variation in the climate. In Fig 1, zone 1 comprises cold regions include northern and central-western parts of the country. Zone 2 comprised of Islamabad Capital Territory (ICT), some parts of Azad-Jammu and Kashmir and Khyber Pakhtoonkhwa which is part of the monsoon dominated region and receive

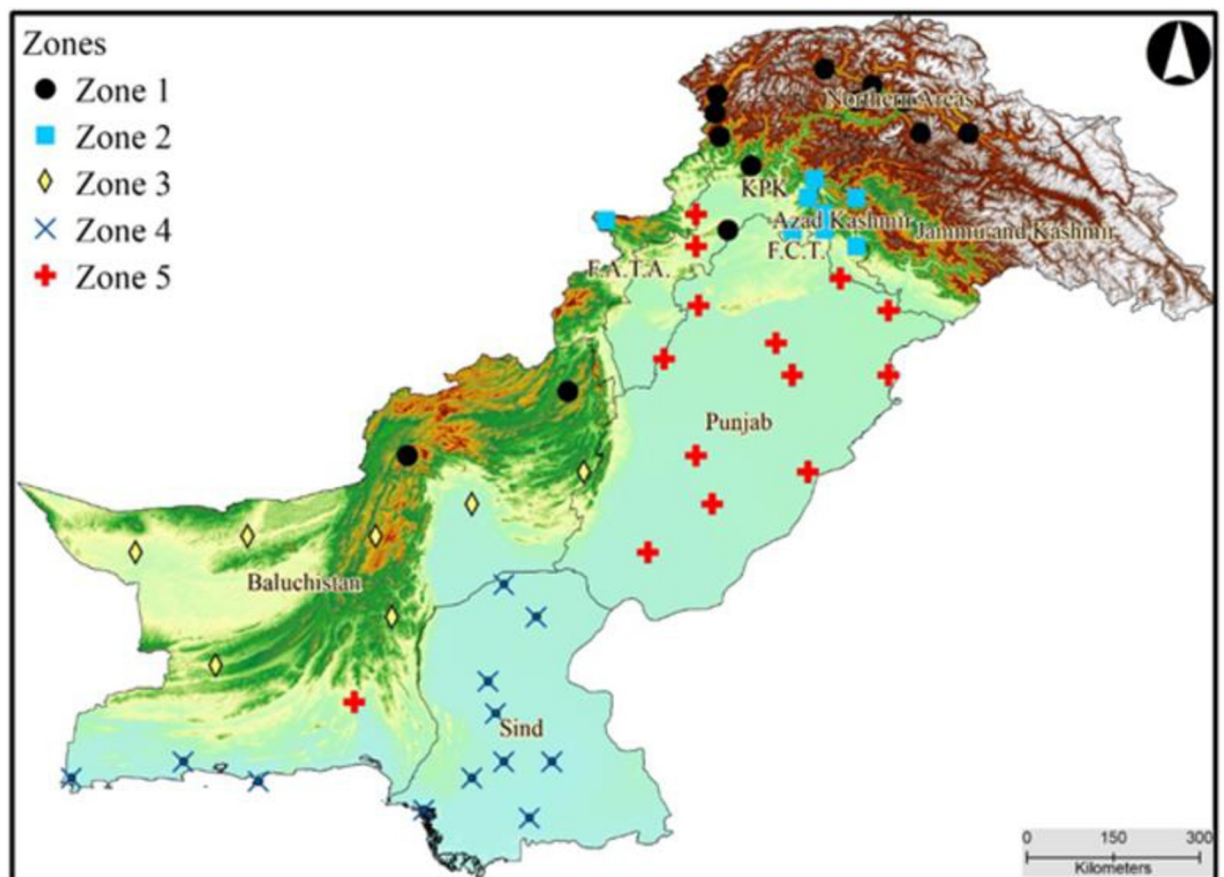

**Fig 1. Five homogeneous climate zones of Pakistan.** We used open access SRTM data to generate Fig 1, there is no copyright restrictions to use the data. Source: NASA Shuttle Radar Topography Mission (SRTM) (2013). Shuttle Radar Topography Mission (SRTM) Global. Distributed by OpenTopography. <https://doi.org/10.5069/G9445JDF>. Accessed: 2022-04-09.

<https://doi.org/10.1371/journal.pone.0271626.g001>

maximum rainfall during the monsoon season. Zone 3 is the south-western part of the country and has least rainfall in a year as compared to the other regions of the country. Zone 4 includes the south-eastern and coastal areas in the south of the country. Zone 5 is the central-eastern part of the country and due to its fertile land, it is considering the food basket of the country. Observed daily climate data (maximum, minimum temperature and precipitation) for the period of 1962–2019 was acquired from Pakistan Meteorological Department (PMD) for fifty-four (54) meteorological stations across the country. The spatial distribution of meteorological stations is shown in Fig 1. The data was divided into two independent climatic periods (1962–1990 and 1991–2019) for the assessment of climate change and extremes analysis over Pakistan.

### 3. Methodology

#### 3.1. Inconsistencies in the data

There were some missing values in the maximum, minimum temperature and precipitation particularly at the stations situated at high elevation. There are various statistical methods available to address the issue of missing values, for instance, multivariate regression, interpolation, imputation etc. In this study, imputation method (a regression-based approach) is used at multiple stations to preserve the spatial dependence structure. Multiple chains have been run and the convergence is assessed in each chain after a specified number of iterations. The number of iterations depend on researcher and the nature of the study [52]. However, the convergence of the process can be assessed at each iteration. The process can be stopped if there are no significant changes during the successive iterations. It is important to note that the inhomogeneous data need to be homogenized before the start of further analysis [53]. Inhomogeneities in data may occur due to breaks, changes or disorder in measuring instruments, observing practices of enumerators, location, and environment of the stations. The standard normal homogeneity tests (SNHT) are useful tools to assess the homogeneity, consistency and to detect the spikes and outliers in daily time series [54–57]. The commonly used SNHT for testing the homogeneity of data include Buishand Range test, Pettitt test, and Von Neumann Ratio test. In this study we have used Buishand Range test for testing the homogeneity of the data which can identify the month/year where the gap occurs. For further details about the above-mentioned homogeneity tests, we refer to [58].

#### 3.2. Climate change assessment

For climate change assessment, the average differences between the two time slices are tested for possible statistical significance at a 5% level of significance. This is carried out under the hypothesis testing procedures of the student t-test. Under this procedures, the null hypothesis states that there is no difference between the average climatology of two-time slices where the alternative hypothesis states opposite to the null hypothesis. The hypothesis under the student t-test can be formulated as:

$$H_0 : \text{on the average there is no change in the climatology of both time slices}$$

Vs

$$H_A : \text{on the average there is change in the climatology of both time slices}$$

Alternatively, it can be written as:

$$H_0 : \mu_{1991-2019} - \mu_{1962-1990} = 0$$

Vs

$$H_A : \mu_{1991-2019} - \mu_{1962-1990} \neq 0$$

Where  $H_0$  and  $H_A$  represent null and alternative hypothesis, respectively. The notation  $\mu_{1962-1990}$  and  $\mu_{1991-2019}$  represent the average climatology during 1962–1990 and 1991–2019, respectively. Here the average climatology means average temperature or precipitation for the mentioned time duration. The change between the two time slices is significant at 5% level of significance if the p-value of the test is less than or equal to 0.05. To assess the detailed behaviors of zone-wise climatology, this analysis was carried out on a seasonal as well as on annual basis.

### 3.3. Trend analysis

For trend analysis, a non-parametric test, the modified version of MK (mMK) test has been used initially proposed by [59] and widely uses in hydrology and climatology for trend analysis (e.g., [60,61]). The null hypothesis in MK test is “no monotonic trend is present in the data”. Which means that if the p-value of the test is less than or equal to 0.05, then it is concluded that there is a trend in the data at 5% level of significance. For further details about the test statistic and calculation of the MK test, we refer to [62].

### 3.4. Climate extremes analysis

Climate extremes related to temperature and precipitation were calculated for both time slices. To assess the changes in climate extremes, probability density functions were drawn for both time slices and a comparison is made between them. To investigate spatial variability and changes, the changes in climate extremes were interpolated to the target location by using a geostatistical interpolation method called Kriging. The analysis provides information about the changes in climate extremes during the two-time slices over the full domain. Finally, the statistical significance of the climate extremes was performed by using a 5% level of significance. A comparison was made between climate extremes in both time slices for temperature and precipitation in each climate zone in terms of statistical significance. For definition and unit of measurement of climate extremes, we refer to [63,64]. A summary of the climate extremes used in this study is given in Annex-01.

### 3.5. Climate change assessment and extremes' analysis in HKH region

HKH comprises one of the world's largest non-polar glaciers [65–67], therefore, climate change and extremes can have significant impacts on snow and glacier melt which can further alter the hydrological regime of this region. Different studies conducted about trends in temperature, precipitation and extremes over Pakistan recently. For instance, the results of Bhatti et al. [68] suggested that the linear trend of all precipitation extreme indices showed an increasing tendency over Pakistan during 1980–2016. The study of Ullah et al. [69] illustrated that the spatial distributions of T<sub>min</sub> and T<sub>max</sub> showed a warming trend over the whole country, however, the seasonal and annual T<sub>min</sub> (T<sub>max</sub>) exhibited sharp increasing trends in the southern, southwestern and southeastern (northern and southwestern mountainous) regions of Pakistan. Elevation dependent significant fluctuations have been noted in long-term precipitation trend (during 1980–2016) in Pakistan with these categories: decreases in 500–1000m and 1000–1500m elevation zones; significant increasing trend in elevation zones of  $\leq 500$ m and  $\geq 1500$  m [70]. Strong variability has been noted in precipitation during 1986–2005 over Pakistan, particularly in the northern parts of the country. For instance, a positive trend in the precipitation variability was noted during the winter season in Himalaya and Karakorum region while a negative trend was noted during pre-monsoon season in the Karakorum and Himalayas regions [71]. Studies related to extremes analysis suggested that the precipitation and temperature extremes like warm nights, summer days, warm days, warmest day, and

coldest day increased during 1980–2016 over Pakistan [72,73]. Archer [74] investigated that with the rise of 1 °C in average temperature can cause an increase of 16–17% in river flow in the upper Indus Basin.

Few previous studies compared temperature and precipitation trends on local scale glaciers in the Karakoram and Himalayas in the UIB [75,76]. These findings suggest that slight temperature and precipitation supported the marginal retreating trends. The glaciers changes in correlation with the local climate improves the assessment of contemporary and future glaciers behavior under the changing climate. Our long-term climate assessment would improve the cryosphere changes in the glacier's rich mountainous region in the context of the Karakoram Anomaly.

There are seven meteorological stations with long-term observations in this region as shown in Table 1. The long-term meteorological changes were investigated by using observed data at each station. The significance of difference (average changes) between the two periods (1962–1990 and 1991–2019) was tested by utilizing a t-test to see whether it is significantly changing or not for each station separately on a seasonal basis. This can help to see the significance of the changes in average temperature and precipitation on a seasonal basis in different parts of the Karakoram region. In addition, the mMK test was used to identify a monotonic trend in temperature and precipitation. Finally, climate extremes were calculated for each station to see whether it is behaving differently than the zone wise climate extremes. This special part may disclose the latest status of climate change in different parts of the Karakoram and may update the present status of Karakoram anomaly which was first investigated by [43]. The details of meteorological station in Northern Pakistan are given in Table 1, with four stations are in the Karakoram and the remaining in the Himalaya and Hindukush region. The step-by-step methodology of this study is presented in Fig 2.

## 4. Results

Before the start of formal analysis, the data was investigated carefully for missing values and inhomogeneity. After filling the missing values using imputation, the results of SNHT test show that the data is homogeneous in time. Therefore, there was no need of any adjustment. The climate change extreme results of this study are discussed zone-wise and thereafter the new findings about the Karakoram anomaly. Considering the importance of the Karakoram region, climate extremes analysis is also presented for each station separately in this region.

### 4.1. Estimation

**Zone 1.** The difference between the two-time slices (1991–2019 and 1962–1990) was tested for possible significance in temperature and precipitation on a seasonal basis. A significant increase in temperature during DJF and MAM and a significant decrease during JJA and

**Table 1. Brief information about meteorological stations situated in Northern Pakistan and used for Karakoram Anomalies investigation.**

| S. No | Station | Latitude | Longitude | Mountain range   | Altitude       |
|-------|---------|----------|-----------|------------------|----------------|
| 1     | Astore  | 35.20    | 74.54     | Himalaya         | 2,168.0 meters |
| 2     | Bunji   | 35.75    | 74.75     | <b>Karakoram</b> | 1,372.0 meters |
| 3     | Chilas  | 35.75    | 74.00     | Hindukush        | 1,250.0 meters |
| 4     | Darosh  | 35.50    | 71.75     | Hindukush        | 1,464.0 meters |
| 5     | Gilgit  | 36.00    | 74.50     | <b>Karakoram</b> | 1,460.0 meters |
| 6     | Gupis   | 36.25    | 73.50     | <b>Karakoram</b> | 2,156.0 meters |
| 7     | Skardu  | 35.25    | 75.75     | <b>Karakoram</b> | 2,317.0 meters |

<https://doi.org/10.1371/journal.pone.0271626.t001>

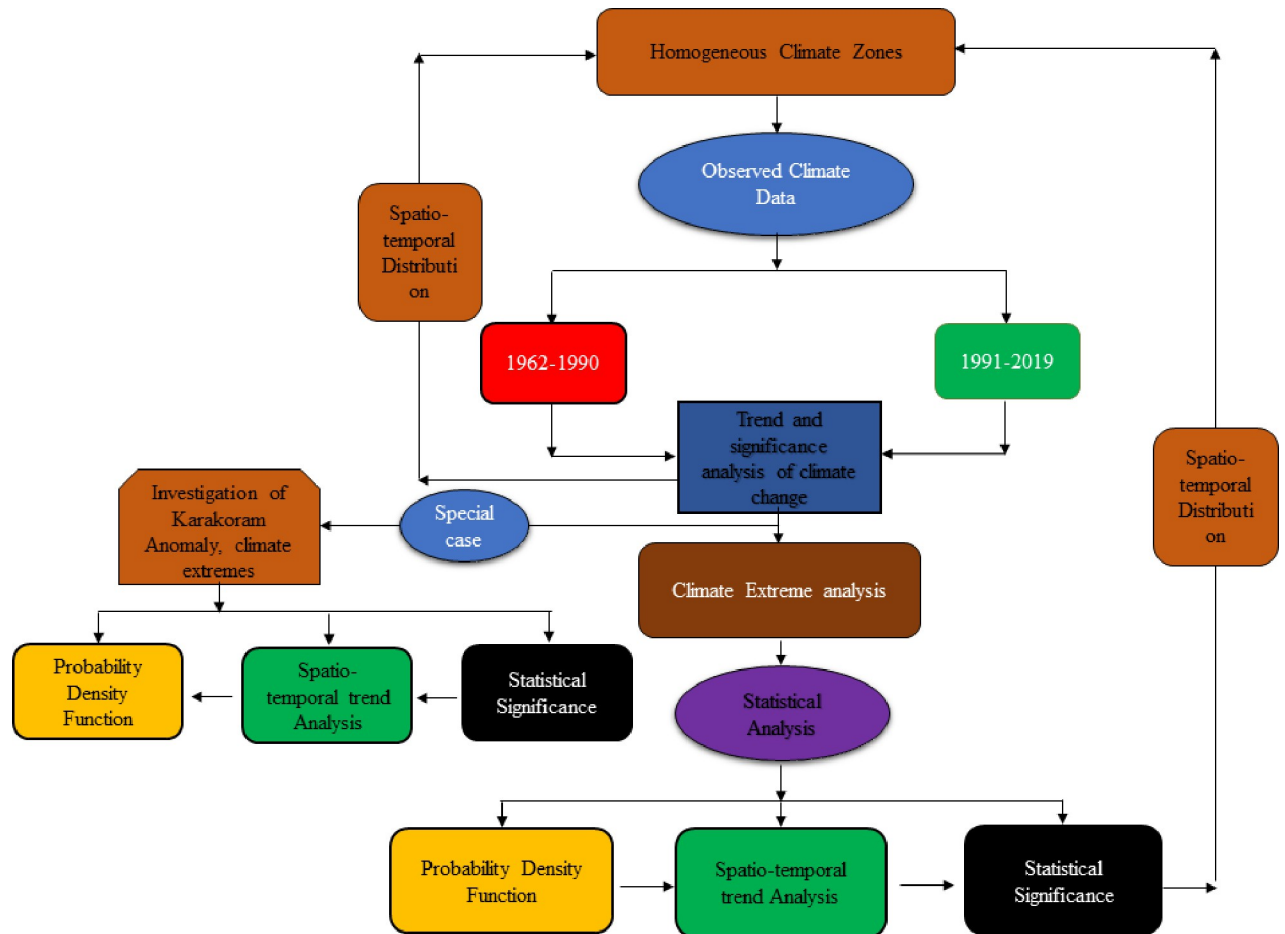

Fig 2. Schematic presentation of the methodology of the study.

<https://doi.org/10.1371/journal.pone.0271626.g002>

SON was observed as shown in Table 2. Precipitation increased significantly during all seasons except JJA. The mMK tests' results for maximum, minimum temperature and precipitation

Table 2. Test of significance of the difference between 1991–2019 and 1962–1990 about average temperature and precipitation for all seasons and climate zones.

| Variable            | Season  | Zone-1          | Zone-2           | Zone-3           | Zone-4           | Zone-5           |
|---------------------|---------|-----------------|------------------|------------------|------------------|------------------|
| Average Temperature | DJF     | 1.8174***       | 0.0358           | 0.3453***        | 0.6908***        | 0.5422***        |
|                     | MAM     | 1.2477***       | 0.3193***        | 0.1619**         | 0.3604***        | 0.9524***        |
|                     | JJA     | -1.2613***      | 0.0654**         | -0.4206***       | -0.1703***       | 0.0501           |
|                     | SON     | -0.5780***      | -0.0100          | 0.3273***        | 0.3578***        | 0.4525***        |
|                     | Overall | <b>0.3016**</b> | <b>0.1033</b>    | <b>0.1017</b>    | <b>0.3077***</b> | <b>0.4992***</b> |
| Precipitation       | DJF     | 2.4593***       | 4.8609***        | 0.1886           | 0.2085           | 2.2729****       |
|                     | MAM     | 0.7455**        | 2.0928**         | 0.7138***        | 0.1233           | 0.7285           |
|                     | JJA     | 0.0995          | 5.5510***        | 1.9361***        | 1.1500**         | 4.9269***        |
|                     | SON     | 0.9809***       | 3.4153***        | 0.5277***        | 1.5977***        | 3.7380***        |
|                     | Overall | <b>1.0649**</b> | <b>3.9773***</b> | <b>0.8455***</b> | <b>0.7703**</b>  | <b>2.9174***</b> |

Note: Where “\*\*\*\*” and “\*\*\*” indicate significance of the test at 1% and 5% level of significance. DJF = December, January, February; MAM = March, April, May; JJA = June, July, August; SON = September, October, November.

<https://doi.org/10.1371/journal.pone.0271626.t002>



are shown in [Table 3](#). For zone 1, the mMK test for precipitation's change shows significantly decreasing trend with value  $-0.0618$ . The values of mMK statistic for changes in maximum and minimum temperature are  $0.0752$  and  $0.0762$ , respectively, indicating increasing trends. The mMK test's results support the Karakoram anomaly during the 1962–1990 given in [Table 5](#), however, the decadal analysis during the 1990–2019 offers complex results (discussed in detail under the Climate Change assessment and extremes' analysis in HKH region). During the last decade, the trend analysis show that precipitation and temperature have decreasing and increasing trends, respectively, at the stations located in the Karakoram region.

Results related to climates' extremes are given in [Figs 3 and 4](#) for all zones. Most of the temperature extremes are significantly increased during 1991–2019. The number of frost days decreased significantly while growing season length and summer days increased significantly in zone 1 (Northern Pakistan). Interestingly, TN10P shows a significantly decreasing trend in 1991–2019 while increasing trend in 1962–1990. TX10P and TX90P have significantly decreasing and increasing trends, respectively, during 1991–2019. Most of the precipitation extremes have increasing trends during 1962–1990 and decreasing trends during 1991–2019. For example, PRCPTOT, R10mm, R20mm and R25mm have significantly increasing and significantly decreasing trend during 1962–1990 and 1991–2019, respectively. R95P decreased but R99P increased in zone 1. Spatial distribution of changes in selected temperatures' extremes are presented in [Figs 5 and 6](#) while changes in selected precipitations' extremes are mentioned in [Fig 7](#) for all climate zones.

The distribution of the number of CWD is displayed in [Fig 8](#) for all zones. For zone 1, the average number of CWD increased from 16 to 19 in 1991–2019 compared to 1962–1990. A strong increase in variability is observed during 1991–2019. The maximum number of CDD is 60 and 40 during 1962–1990 and 1991–2019, respectively, given in [Fig 9](#). The maximum number of Frost days (FD0) has decreased from 110 to 88 during 1991–2019 compared to 1962–1990 as shown in [Fig 10](#).

**Zone 2.** The results of t-statistic ([Table 2](#)) show a significant increase in average temperature during MAM and JJA, increase during DJF, and insignificant decrease during SON. The mMK results for changes in maximum and minimum temperature indicate significantly increasing trend with values  $0.0293$  and  $0.0938$ , respectively. On the other hand, average precipitation increased significantly throughout in all seasons. The mMK tests' results ([Table 3](#)) show a significantly decreasing trend in precipitation with a magnitude of  $-0.0141$ .

Interestingly, this is the only region with the increasing number of frost days and decreasing GSL in both time slices. The SU25, TMAXMean, TN90p, TR20 and TX90p increased during the 1991–2019. The TMINMean increased significantly while TX10p and TN10p both decreased significantly during the 1991–2019. The CWD, WSDI, R10mm, R20mm and R25mm decreased during the 1991–2019. The CSDI, PRCPTOT, R95p and R99p decreased during the 1991–2019. The RX1day (Max 1-day precipitation amount) and Rx5day (Max 5-day precipitation amount) increased significantly and decreased during the 1962–1990 and 1991–2019, respectively.

The average number of CWD increased from 22 to 26 in the recent period. The standard deviation of CWD has increased from 8 (during 1962–1990) to 11 (during 1991–2019). The CDD ([Fig 9](#)) slightly reduced, with insignificant variability. The maximum number of FD0 recently increased from 34 to 47.

**Zone 3.** The average temperature significantly increased in this region, except a significant decreased for JJA with a value of  $-0.42$ . In contrast, the average precipitation increased significantly throughout except an insignificant increase during the DJF. The results of mMK test show decreasing trends in precipitation change and minimum temperature change while an

**Table 3. Man-Kendall test for testing trend in each duration (1962–1990, 1991–2019, Change = difference between 1991–2019 and 1962–1990).** Each series has two columns, first is for the estimated value of Kendall  $\tau$  and second is for their corresponding p-value.

| S. No | Zones | Precipitation  |           |                |           |                               |           | Max. TMP       |         |                |           |                               |               | Min. TMP       |              |                |               |                               |         |
|-------|-------|----------------|-----------|----------------|-----------|-------------------------------|-----------|----------------|---------|----------------|-----------|-------------------------------|---------------|----------------|--------------|----------------|---------------|-------------------------------|---------|
|       |       | 1962–1990      |           | 1991–2019      |           | Changes (1991-2019-1962-1990) |           | 1962–1990      |         | 1991–2019      |           | Changes (1991-2019-1962-1990) |               | 1962–1990      |              | 1991–2019      |               | Changes (1991-2019-1962-1990) |         |
|       |       | Kendall $\tau$ | P-Value   | Kendall $\tau$ | P-Value   | Kendall $\tau$                | P-Value   | Kendall $\tau$ | P-Value | Kendall $\tau$ | P-Value   | Kendall $\tau$                | P-Value       | Kendall $\tau$ | P-Value      | Kendall $\tau$ | P-Value       | Kendall $\tau$                | P-Value |
| 1     | Z-1   | 0.0453698      | 5.476e-11 | -4.554031e-02  | 3.078e-11 | -6.181994e-02                 | 2.2e-16   | -2.941424e-03  | 0.6556  | 2.879244e-02   | 1.266e-05 | 7.515349e-02                  | -1.370601e-02 | 0.03766        | 1.215344e-02 | 0.06534        | 7.616308e-02  | 2.2e-16                       |         |
| 2     | Z-2   | -8.099797e-03  | 0.2362    | -1.955711e-02  | 0.004891  | -1.409285e-02                 | 0.03446   | 3.382319e-03   | 0.608   | 2.200206e-02   | 0.00084   | 2.933388e-02                  | -1.510223e-02 | 0.02201        | 2.225517e-02 | 0.00074        | 9.385996e-02  | < 2.2e-16                     |         |
| 3     | Z-3   | 1.265816e-01   | < 2.2e-16 | -1.866923e-02  | 0.01437   | -8.902188e-02                 | < 2.2e-16 | -1.167005e-02  | 0.07684 | 2.368513e-02   | 0.0003292 | 6.451906e-02                  | 2.921715e-02  | 9.437e-06      | 1.949849e-03 | 0.7675         | -6.366869e-02 | < 2.2e-16                     |         |
| 4     | Z-4   | 2.655612e-02   | 0.0005049 | 7.844310e-03   | 0.3084    | -9.856097e-03                 | 0.1802    | 1.122931e-02   | 0.08862 | 1.109748e-02   | 0.09244   | -2.1111771e-02                | -4.265234e-03 | 0.5178         | 6.707298e-02 | 2.2e-16        | 1.583697e-01  | < 2.2e-16                     |         |
| 5     | Z-5   | 1.998956e-02   | 0.005168  | -2.121013e-02  | 0.002958  | -2.239563e-02                 | 0.001017  | 1.140568e-02   | 0.08369 | 9.684728e-03   | 0.1419    | -1.569585e-02                 | 7.689117e-03  | 0.2436         | 2.872170e-02 | 1.328e-05      | 5.604884e-02  | < 2.2e-16                     |         |

<https://doi.org/10.1371/journal.pone.0271626.t003>

| Zone/<br>Variable | Temperatures' Extremes |            |            |            |       |            |              |              |            |            |            |            |            |            |            |            |            |
|-------------------|------------------------|------------|------------|------------|-------|------------|--------------|--------------|------------|------------|------------|------------|------------|------------|------------|------------|------------|
|                   | Duration               | DTR        | FD0        | GSL        | ID0   | SU25       | TMAX<br>mean | TMIN<br>mean | TN10P      | TN90P      | TNN        | TNX        | TR20       | TX10P      | TX90P      | TXN        | TXX        |
| Z1                | 1962-1990              | Light Blue | Light Blue | Light Blue | Green | Light Blue | Light Blue   | Light Blue   | Light Blue | Light Blue | Light Blue | Dark Blue  | Dark Blue  | Light Blue | Light Blue | Light Blue | Light Blue |
|                   | 1991-2019              | Dark Blue  | Dark Blue  | Dark Blue  | Green | Dark Blue  | Dark Blue    | Light Blue   | Dark Blue  | Light Blue | Dark Blue  | Dark Blue  | Dark Blue  | Dark Blue  | Dark Blue  | Dark Blue  | Dark Blue  |
| Z2                | 1962-1990              | Dark Blue  | Light Blue | Light Blue | Green | Light Blue | Light Blue   | Dark Blue    | Light Blue | Light Blue | Light Blue | Light Blue | Light Blue | Light Blue | Light Blue | Light Blue | Light Blue |
|                   | 1991-2019              | Green      | Light Blue | Light Blue | Green | Light Blue | Dark Blue    | Dark Blue    | Light Blue | Light Blue | Light Blue | Light Blue | Light Blue | Dark Blue  | Light Blue | Light Blue | Light Blue |
| Z3                | 1962-1990              | Dark Blue  | Dark Blue  | Light Blue | Green | Light Blue | Light Blue   | Dark Blue    | Light Blue | Light Blue | Light Blue | Light Blue | Light Blue | Light Blue | Light Blue | Light Blue | Dark Blue  |
|                   | 1991-2019              | Dark Blue  | Dark Blue  | Light Blue | Green | Light Blue | Dark Blue    | Light Blue   | Light Blue | Light Blue | Light Blue | Light Blue | Light Blue | Dark Blue  | Light Blue | Light Blue | Dark Blue  |
| Z4                | 1962-1990              | Light Blue | Green      | Light Blue | Green | Light Blue | Light Blue   | Light Blue   | Light Blue | Light Blue | Light Blue | Light Blue | Light Blue | Dark Blue  | Light Blue | Light Blue | Light Blue |
|                   | 1991-2019              | Dark Blue  | Green      | Light Blue | Green | Light Blue | Dark Blue    | Dark Blue    | Dark Blue  | Dark Blue  | Dark Blue  | Dark Blue  | Dark Blue  | Light Blue | Light Blue | Light Blue | Light Blue |
| Z5                | 1962-1990              | Light Blue | Light Blue | Light Blue | Green | Light Blue | Light Blue   | Light Blue   | Light Blue | Light Blue | Light Blue | Light Blue | Light Blue | Light Blue | Light Blue | Light Blue | Dark Blue  |
|                   | 1991-2019              | Dark Blue  | Green      | Light Blue | Green | Light Blue | Dark Blue    | Dark Blue    | Dark Blue  | Dark Blue  | Light Blue | Light Blue | Light Blue | Light Blue | Light Blue | Light Blue | Light Blue |

|              |                                   |             |                                 |
|--------------|-----------------------------------|-------------|---------------------------------|
| Light Blue   | <i>Insignificantly decreasing</i> | Dark Blue   | <i>Significantly decreasing</i> |
| Light Orange | <i>Insignificantly increasing</i> | Dark Orange | <i>Significantly increasing</i> |

**Fig 3. Climate extremes related to temperature for each climatic zone and two independent time duration.** Each color has specific meaning and given in note mention with Fig 4. Note: The colors represent different status for each extreme mentioned in these figures. Green color shows no changes.

<https://doi.org/10.1371/journal.pone.0271626.g003>

increasing trend for maximum temperature change with the values -0.0890, -0.0637 and 0.0645, respectively.

Both GSL and SU25 increased in the recent period. TMAXMean has decreasing and significantly increasing trend in the first and second-time slice, respectively. The results of TMIN-Mean are in contrast with TMAXMean. TN10P, TN90P, TNN, TNX, TR20 decreased in the recent time period. A significantly decreasing and increasing trend is noted in TX10P and TX90P in the second time slice, respectively. In addition, most of the precipitation extremes indicate an increasing trend during the first time slice except CDD, CSDI and WSDI with decreasing trend. In contrast, most of these extremes decreased except CDD, R10mm, R25mm and WSDI which have increasing trend during the 1991–2021. R95P, R99P and PRCPTOT have decreasing trend in the second time slice.

The average CWD and their standard deviation reduced from 8 and 6 during 1962–1990 to 6 and 3 during 1991–2019. The CDD (Fig 9) drastically decreased from 330 to 170 during 1962–1990 to 1991–2019 with decreased variability in the recent period. The average number of FD0 (Fig 10) reduced from 55 to 34 during 1962–1990 to 1991–2019.

**Zone 4.** The average precipitation and temperature changes in zone 4 are given in Table 2. The average temperature changed significantly with an increase during DJF, MAM, SON and

| Zone/V<br>ariable | Duration  | Precipitations' Extremes |              |              |              |              |              |              |              |              |              |              |              |              |
|-------------------|-----------|--------------------------|--------------|--------------|--------------|--------------|--------------|--------------|--------------|--------------|--------------|--------------|--------------|--------------|
|                   |           | CDD                      | CSDI         | CWD          | PRCPTOT      | R10mm        | R20mm        | R25mm        | R95          | R99p         | RX1da<br>y   | RX5da<br>y   | SDII         | WSDI         |
| Z1                | 1962-1990 | Light Blue               | Light Orange | Light Orange | Dark Orange  | Dark Orange  | Dark Orange  | Dark Orange  | Light Orange | Light Orange | Light Orange | Light Orange | Dark Orange  | Light Blue   |
|                   | 1991-2019 | Light Orange             | Light Blue   | Light Orange | Dark Blue    | Dark Blue    | Dark Blue    | Dark Blue    | Light Blue   | Light Orange | Light Orange | Light Orange | Light Blue   | Dark Orange  |
| Z2                | 1962-1990 | Light Blue               | Light Orange | Light Blue   | Dark Orange  | Light Orange | Light Orange | Light Orange | Dark Orange  | Dark Orange  | Dark Orange  | Dark Orange  | Dark Orange  | Light Orange |
|                   | 1991-2019 | Light Orange             | Light Blue   | Light Orange | Light Blue   | Light Orange | Light Orange | Light Orange | Light Blue   | Light Blue   | Light Blue   | Light Blue   | Light Blue   | Light Orange |
| Z3                | 1962-1990 | Light Blue               | Dark Blue    | Light Orange | Dark Orange  | Dark Orange  | Dark Orange  | Dark Orange  | Light Orange | Light Orange | Light Orange | Light Orange | Light Orange | Light Blue   |
|                   | 1991-2019 | Light Orange             | Light Blue   | Light Orange | Light Blue   | Light Orange | Light Orange | Light Orange | Light Blue   | Light Blue   | Dark Blue    | Light Blue   | Light Blue   | Light Orange |
| Z4                | 1962-1990 | Light Blue               | Light Orange | Light Orange | Light Orange | Light Orange | Light Orange | Light Orange | Light Orange | Light Orange | Light Orange | Light Orange | Dark Orange  | Light Blue   |
|                   | 1991-2019 | Light Blue               | Dark Blue    | Light Orange | Light Blue   | Light Orange | Light Orange | Light Orange | Light Orange | Light Orange | Light Orange | Light Orange | Light Blue   | Light Orange |
| Z5                | 1962-1990 | Light Blue               | Light Blue   | Light Orange | Light Orange | Light Orange | Light Orange | Dark Orange  | Light Orange | Light Blue   | Light Orange | Light Orange | Light Orange | Light Blue   |
|                   | 1991-2019 | Light Orange             | Dark Blue    | Light Orange | Light Blue   | Light Orange | Light Orange | Light Orange | Light Blue   | Light Orange | Light Orange | Light Orange | Light Blue   | Light Orange |

|              |                                   |             |                                 |
|--------------|-----------------------------------|-------------|---------------------------------|
| Light Blue   | <i>Insignificantly decreasing</i> | Dark Blue   | <i>Significantly decreasing</i> |
| Light Orange | <i>Insignificantly increasing</i> | Dark Orange | <i>Significantly increasing</i> |

**Fig 4. Climate extremes related to precipitation for each climatic zone and two independent time duration.** Each color has specific meaning and given below. Note: The colors represent different status for each extreme mentioned in these figures. Green color shows no changes.

<https://doi.org/10.1371/journal.pone.0271626.g004>

decrease during JJA. The magnitude of change during DJF and JJA are highest with values 0.6908 and -0.1703, respectively. In addition, precipitation increased significantly only during JJA and SON. The mMK test shows a decreasing trend in precipitation and maximum temperature with values -0.0986 and -0.0212, respectively. The change in minimum temperature has significantly increasing trend with value a value of 0.158.

During the second time slice, GSL and SU25 increased and decreased, respectively. TMAX-Mean has an increasing trend in contrast to the significant increasing trend of TMINMean during 1991–2019. TN10P decreased during the second time slice compared to the first time slice. On the other hand, TN90P significantly increased during the second time slice. TX10P and TX90P show a decreasing and increasing trend, respectively, during the second time slice. During the second time slice, all precipitation extremes have decreasing trend except an increase in CWD.

The average number of CWD (Fig 8) has increased from 7 to 8 annually. The standard deviation of CWD increased from 3 to 5 during the 1991–2019. The maximum number of CWD is 19 during 1991–2019. The maximum number of CDD reduced from 225 to 149 during 1962–1990 and 1991–2019, respectively. No significant change with the average number of zero is observed in the distribution of FD0 (Fig 10).

**Zone 5.** The average temperature increased significantly except JJA with an insignificant increase. Changes in average precipitation, except MAM are highly significant. There is a significantly decreasing trend in precipitation and maximum temperature while significantly increasing trend for minimum temperature in this region. The values of mMK test statistic for

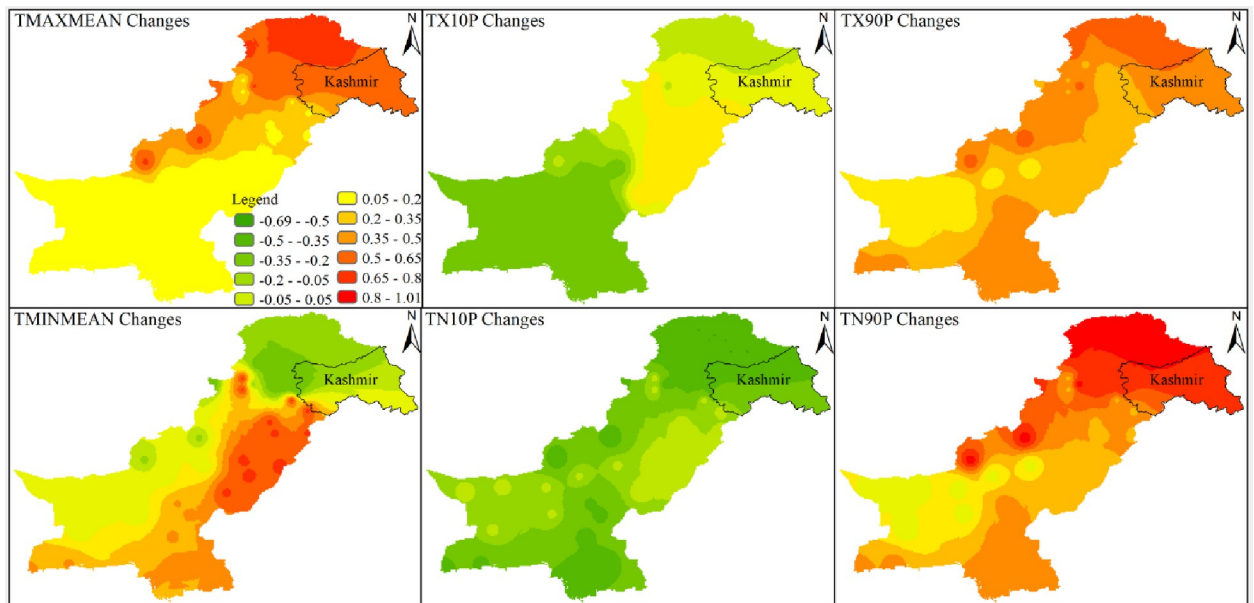

**Fig 5. Spatial distribution of changes during 1991–2019 with respect to 1962–1990 of different climate extremes across Pakistan.** The extremes are TMAXMean, TX10P, TX90P, TMINMean, TN10P, and TN90P. The legend used in top right panel is applicable to all parts of this figure. The shapefile used for this figure is available at <https://data.humdata.org/dataset/pakistan-union-council-boundaries-along-with-other-admin-boundaries-dataset>.

<https://doi.org/10.1371/journal.pone.0271626.g005>

change in precipitation, maximum, and minimum temperature are -0.0224, -0.0157 and 0.0560, respectively.

GSL, SU25, TMINMean, and TMAXMean have increasing trends during both time slices. TN10P has decreasing trend throughout while TN90P has decreasing and significantly increasing trends in the first and second time slice, respectively. TX10P and TX90P have decreasing trends during the second time period. Most of the precipitation extremes have increasing trends during both time slices. CDD, CSDI, R99P and WSDI have decreasing trends during the first time period while CSDI, PRCPTOT, R10mm, R95P and SDII have decreasing trends during the second time period.

The average number of CWD slightly increased from 15 to 17 annually during 1962–1990 to 1991–2019 (Fig 8). In contrast, the standard deviation of CWD decreased from 8 to 6 during

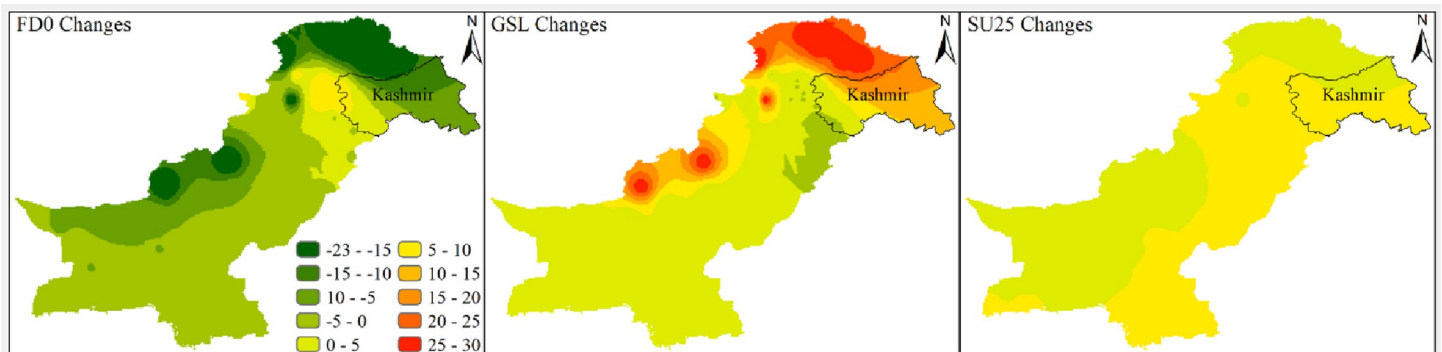

**Fig 6. Spatial distribution of changes during 1991–2019 with respect to 1962–1990 of different climate extremes across Pakistan.** The extremes are FD0, GSL, and SU25. The legend used in the first panel is applicable to all parts of this figure. The shapefile used for this figure is available at <https://data.humdata.org/dataset/pakistan-union-council-boundaries-along-with-other-admin-boundaries-dataset>.

<https://doi.org/10.1371/journal.pone.0271626.g006>

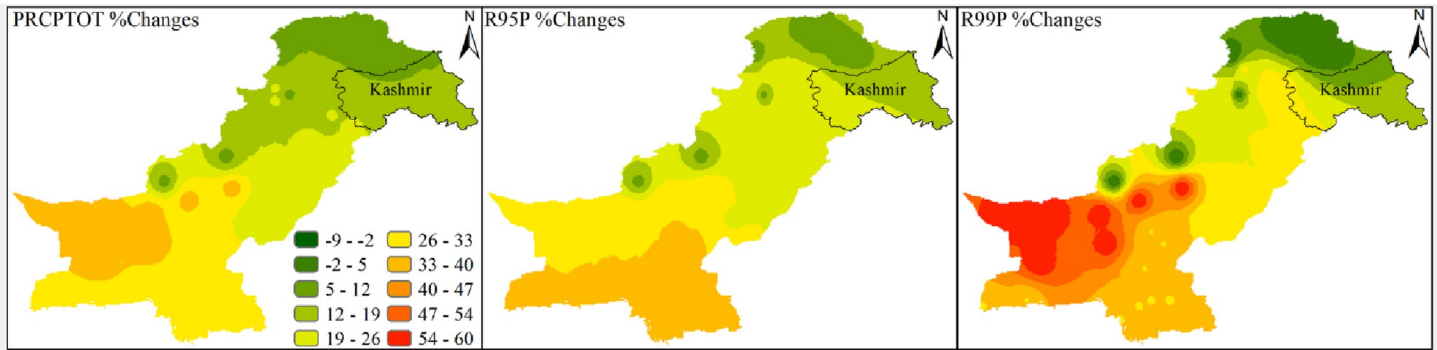

**Fig 7. Spatial distribution of changes during 1991–2019 with respect to 1962–1990 of different climate extremes across Pakistan.** The extremes are PRCPTOT, R95P, and R99P. The legend used in the first panel is applicable to all parts of this figure. The shapefile used for this figure is available at <https://data.humdata.org/dataset/pakistan-union-council-boundaries-along-with-other-admin-boundaries-dataset>.

<https://doi.org/10.1371/journal.pone.0271626.g007>

1962–1990 to 1991–2019. The distribution of CDD increased from 75 to 92 during 1962–1990 to 1991–2019. The number of FD0 reduced considerably from 8 to 2 during 1962–1990 to 1991–2019 (Fig 10).

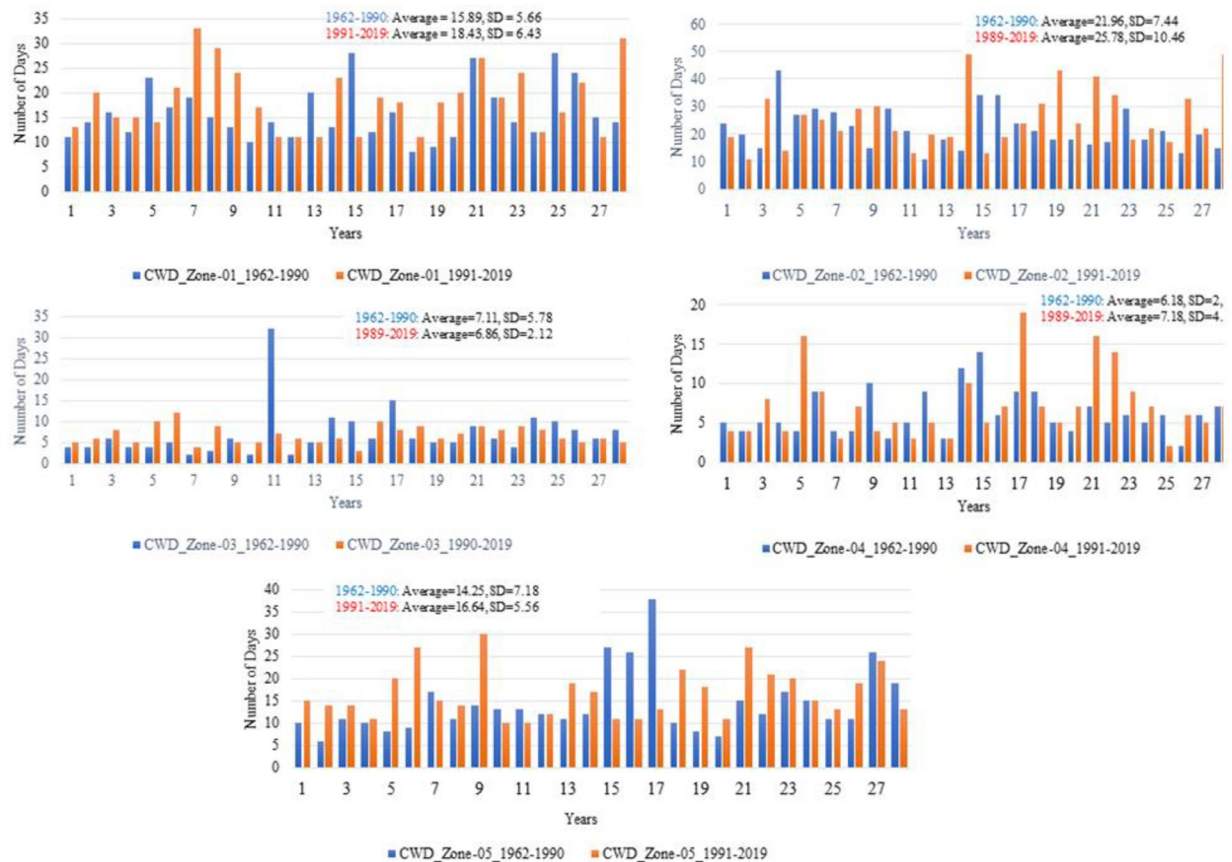

**Fig 8. Number of consecutive wet days (CWD) for each climate zone and two independent durations.** In each part of the figure, on x-axis and y-axis, years and number of days are mentioned.

<https://doi.org/10.1371/journal.pone.0271626.g008>

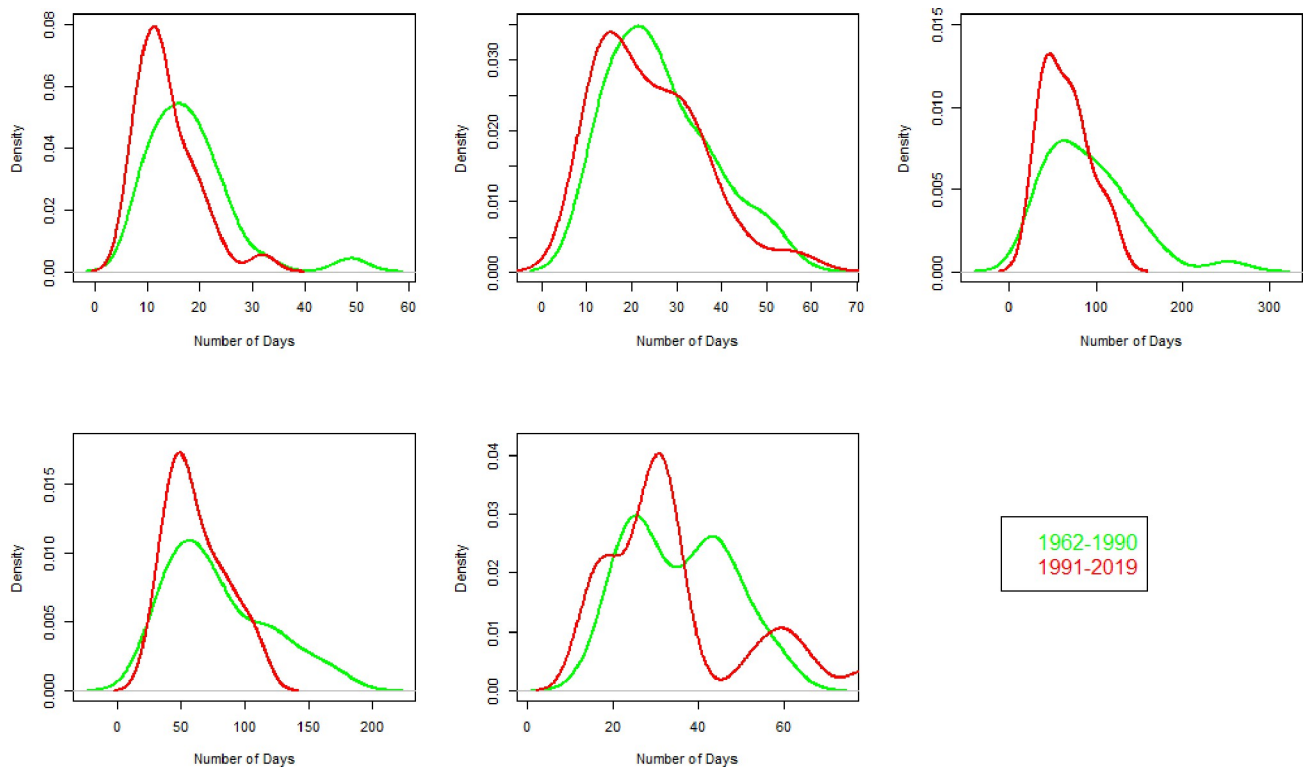

**Fig 9. Probability density function of Consecutive dry days (CDD) for the duration of 1991–2019 and 1962–1990 in each climate zone.** Green and red color represent 1962–1990 and 1991–2019, respectively. On x-axis the number of days and on y-axis the density of CDD is given.

<https://doi.org/10.1371/journal.pone.0271626.g009>

#### 4.2. Climate change and extremes' analysis in HKH region (Present climatic status of Karakoram Anomaly)

The widely known Karakoram anomaly was investigated to see its present status by utilizing the updated observed meteorological data from the North of Pakistan as shown in [Table 1](#). The stations are located between an altitude of 1,250 m a.s.l. at Chilas and 2,317 m a.s.l. at Skardu station. The data was analyzed seasonally to assess the contemporary climate change. The average temperature has an interesting pattern, specifically in winter (DJF), a significant increase at high altitude station (Skardu) of 0.97 and a significant decrease at the lowest station (Chilas) of  $-0.56$  given in [Table 4](#). Almost similar pattern is observed during MAM with the maximum increase at Astore and decrease at Chilas station. During JJA, average temperature decreased at all meteorological stations. Maximum and minimum decrease in the average temperature is noted at Gopis (with the magnitude of  $-1.42^{\circ}\text{C}$ ) and Darosh (with magnitude of  $-0.01^{\circ}\text{C}$ ), respectively. These changes are highly significant except at Chilas meteorological station. In SON, the average temperature has an increasing trend at all stations other than Bunji, Chilas and Gopis with decreasing trend.

[Table 5](#) shows the seasonal trends in precipitation, maximum, and minimum temperature during 1962–1990. During DJF, precipitation has significantly increasing trend except Gopis where the trend is significantly decreasing. Maximum and minimum temperature results show significantly decreasing trend during JJA except Astore with an insignificant decrease in maximum temperature. These results are in line with Karakoram Anomaly during the 1962–1990. [Table 6–8](#) show seasonal trend analysis for precipitation, maximum temperature and minimum temperature during 1991–1999, 2000–2009 and

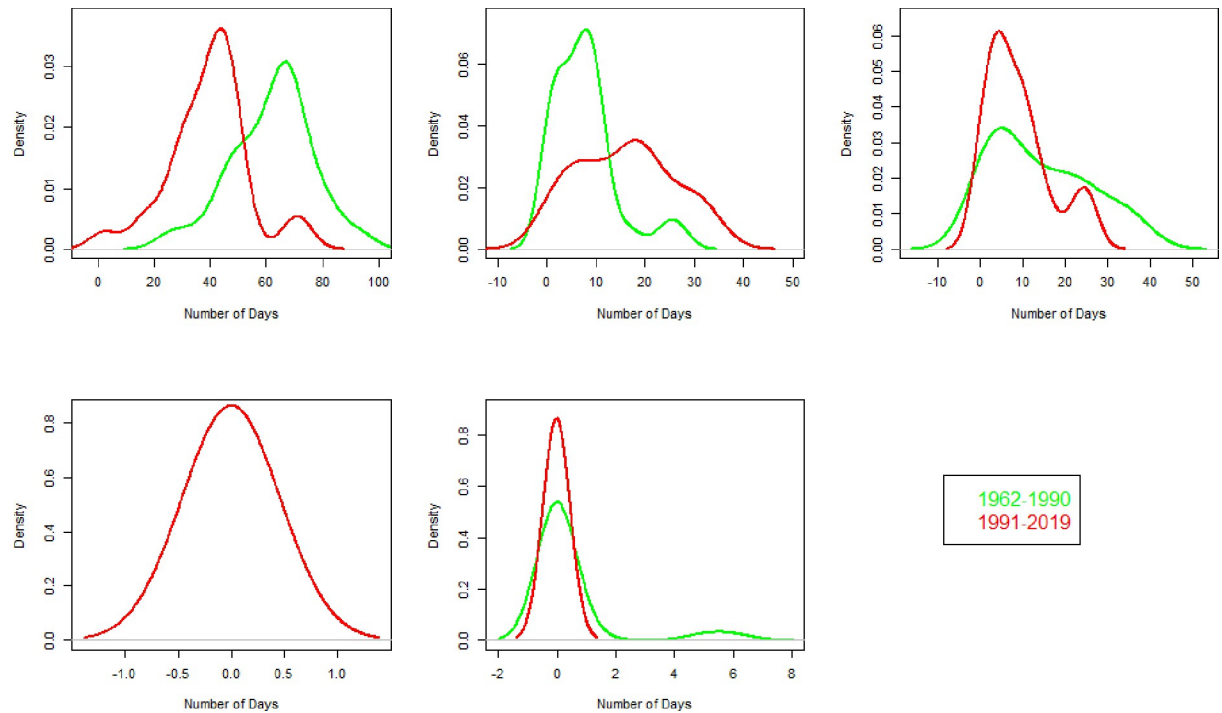

**Fig 10. Probability density function of number of frost days (FD0) for the duration of 1991–2019 and 1962–1990 in each climate zone.** Green and red color represent 1962–1990 and 1991–2019, respectively. On x-axis the number of days and on y-axis the density of FD0 is given.

<https://doi.org/10.1371/journal.pone.0271626.g010>

2010–2019, respectively. Table 6 shows a comparison among three decades (1991–1999, 2000–2009, 2010–2019) using mMK test for precipitation. During 1991–1999, precipitation at Gilgit and Bunji increased while at Gopis and Skardu the trend decreased in DJF. On the contrary, the trend during 2000–2009 remained increasing. The trend changed again and decreased during 2010–2019 except Gopis with an insignificant increasing

**Table 4. Test of significance of the changes between 1991–2019 and 1962–1990 about average temperature and precipitation for all seasons and meteorological stations situated in the Karakoram regions.**

| Variable                                                          | Season         | Stations        |                 |                  |                  |                  |                   |                 |
|-------------------------------------------------------------------|----------------|-----------------|-----------------|------------------|------------------|------------------|-------------------|-----------------|
|                                                                   |                | Astore          | Bunji           | Chilas           | Darosh           | Gilgit           | Gupis             | Skardu          |
| Difference of Average Temperature between 1991–2019 and 1962–1990 | DJF            | 0.5082***       | 0.5404***       | -0.5618***       | 0.7148***        | 0.8567***        | -0.1942***        | 0.9677***       |
|                                                                   | MAM            | 0.6780***       | 0.5298***       | -0.1238          | 0.6121***        | 0.7384***        | -0.0823           | 0.7679***       |
|                                                                   | JJA            | -0.2891***      | -0.9248***      | -0.1220**        | -0.0137          | -0.4890***       | -1.4199***        | -0.2753***      |
|                                                                   | SON            | 0.3906***       | -0.3328***      | -0.2666**        | 0.5326***        | 0.1510           | -0.0157           | 0.0041          |
|                                                                   | <b>Overall</b> | <b>0.3208**</b> | <b>-0.0489</b>  | <b>-0.2671**</b> | <b>0.4600***</b> | <b>0.3121**</b>  | <b>-0.4303***</b> | <b>0.3642**</b> |
| Precipitation                                                     | DJF            | 0.2720***       | 0.1299***       | 0.1980***        | 0.1877**         | -0.2388***       | 0.1456***         | 0.2984***       |
|                                                                   | MAM            | -0.1176         | -0.0347         | 0.0705           | -0.3605***       | -0.1836***       | 0.5083***         | 0.0513          |
|                                                                   | JJA            | 0.1502***       | 0.1719***       | -0.2282**        | 0.03797          | -0.3112**        | 0.3367***         | 0.0850***       |
|                                                                   | SON            | -0.0786         | 0.0604***       | 0.0024           | 0.1001           | -0.0727*         | 0.1046**          | -0.3861**       |
|                                                                   | <b>Overall</b> | <b>0.0558</b>   | <b>0.0817**</b> | <b>0.0098</b>    | <b>-0.0099</b>   | <b>-0.2017**</b> | <b>0.2749***</b>  | <b>0.0119</b>   |

Note: Where “\*\*\*”, “\*\*” and “\*” indicate significance of the test at 1%, 5% and 10% level of significance.

DJF = December, January, February; MAM = March, April, May; JJA = June, July, August; SON = September, October, November.

<https://doi.org/10.1371/journal.pone.0271626.t004>



**Table 5. Station and seasonal wise results of MK test and their statistical significance for precipitation, maximum and minimum temperature during the 1962–1990.**

| Station                         | DJF            |          | MAM            |          | JJA            |          | SON            |          |
|---------------------------------|----------------|----------|----------------|----------|----------------|----------|----------------|----------|
|                                 | Kendall $\tau$ | P-Value  | Kendall $\tau$ | P-Value  | Kendall $\tau$ | P-Value  | Kendall $\tau$ | P-Value  |
| Precipitation (1962–1990)       |                |          |                |          |                |          |                |          |
| Astore                          | 3.87e-02       | 0.011    | 1.63e-02       | 0.270    |                |          | 3.64e-02       | 0.020    |
| Bunji                           | 1.18e-02       | 0.461    | 5.91e-02       | 0.000    | 7.03e-02       | 6.82e-06 | 1.72e-02       | 0.280    |
| Chilas                          | 8.60e-02       | 5.44e-08 | 5.68e-02       | 0.000    | 8.49e-02       | 4.58e-08 | 5.79e-02       | 0.000    |
| Darosh                          | 1.54e-02       | 0.308    | -5.37e-02      | 0.000    | 2.28e-02       | 0.136    | -1.95e-02      | 0.204    |
| Gilgit                          | 4.34e-02       | 0.007    | 3.67e-02       | 0.017    |                |          | 7.05e-02       | 8.89e-06 |
| Gopis                           | -6.32e-02      | 7.60e-05 | -1.14e-01      | 1.95e-13 | -8.49e-02      | 6.16e-08 | -1.19e-01      | 8.97e-14 |
| Skardu                          | 5.05e-02       | 0.001    | 2.67e-02       | 0.083    | 9.11e-02       | 5.33e-09 | 2.02e-02       | 0.205    |
| Maximum Temperature (1962–1990) |                |          |                |          |                |          |                |          |
| Astore                          | -4.38e-02      | 0.001    | 3.42e-02       | 0.009    | -6.06e-03      | 0.648    | 2.72e-03       | 0.838    |
| Bunji                           | 1.98e-02       | 0.140    | 2.75e-02       | 0.036    | -8.89e-02      | 1.88e-11 | -1.74e-02      | 0.188    |
| Chilas                          | 9.25e-03       | 0.490    | 3.76e-02       | 0.004    | -3.13e-02      | 0.02     | -6.33e-03      | 0.634    |
| Darosh                          | -4.00e-02      | 0.003    | 6.11e-02       | 3.72e-06 | -1.81e-02      | 0.173    | -4.18e-02      | 0.002    |
| Gilgit                          | 6.74e-03       | 0.616    | 4.05e-02       | 0.002    | -3.68e-02      | 0.005    | -4.51e-03      | 0.734    |
| Gopis                           | 3.04e-02       | 0.023    | 5.77e-02       | 1.25e-05 | -3.99e-02      | 0.002    | -4.11e-02      | 0.002    |
| Skardu                          | 7.84e-02       | 4.73e-09 | 8.59e-02       | 7.90e-11 | 3.49e-02       | 0.008    | 3.49e-02       | 0.008    |
| Minimum Temperature (1962–1990) |                |          |                |          |                |          |                |          |
| Astore                          | 1.23e-02       | 0.357    | 7.00e-02       | 1.28e-07 | -2.93e-02      | 0.027    | -3.48e-02      | 0.009    |
| Bunji                           | -1.43e-01      | 2.2e-16  | -5.93e-02      | 7.69e-06 | -1.70e-01      | 2.2e-16  | -1.57e-01      | 2.2e-16  |
| Chilas                          | -5.26e-02      | 8.52e-05 | 4.24e-02       | 0.001    | -4.98e-02      | 0.000    | -4.22e-02      | 0.001    |
| Darosh                          | -1.06e-01      | 2.68e-15 | -3.04e-03      | 0.818    | -1.11e-01      | 2.2e-16  | -8.56e-02      | 1.20e-10 |
| Gilgit                          |                |          | 5.03e-03       | 0.704    | -3.74e-02      | 0.005    | -4.54e-02      | 0.000    |
| Gopis                           | 1.68e-02       | 0.21     | 5.08e-02       | 0.000    | -6.19e-02      | 3.08e-06 | -8.87e-02      | 2.53e-11 |
| Skardu                          | 6.14e-02       | 4.46e-06 | -6.95e-03      | 0.600    | -7.90e-02      | 2.78e-09 | -5.60e-02      | 2.45e-05 |

<https://doi.org/10.1371/journal.pone.0271626.t005>

trend. The comparison of these three decades for maximum temperature is shown in Table 7. In JJA, the maximum temperature has a decreasing trend during 1990–1999 except Gilgit and during 2000–2009 at Gopis. The trend during 2010–2019 changed and increased in most of the stations except Gilgit with insignificant decreasing trend in JJA. Minimum temperature shows increasing trend in some parts (Bunji and Gilgit) and decreasing trend in others (Gopis and Skardu) during 1990–1999 and 2000–2009 as shown in Table 8. In contrast, during 2010–2019, minimum temperature shows increasing trend at these stations. These results show conflicting signals in climate. In the most recent decade of 2010–2019, precipitation decreased in DJF and temperature (maximum and minimum) increased in JJA. It is interesting to see a consistently decreasing trend in the SON in temperature (maximum and minimum) considering the overall thirty years period (1991–2019).

The station-wise climate extremes in the northern Pakistan are shown in Fig 11. The results show that SU25 increased throughout except Skardu during 1991–2019. TN10P (cold nights) decreased significantly at some of the stations located in the Northern Pakistan during 1991–2019. TN90P (warm nights), TX10P (cold days) TR20 (tropical nights) have decreasing trend during 1991–2019 in most parts of this region. TX90P (warm days) has mixed trend, decreasing at Darosh, Gilgit and Skardu and increasing trend at the remaining stations.

**Table 6. Seasonal MK test results in the Karakoram region for precipitation.** The table shows the Kendall  $\tau$  and their significance for the 1990–1999, 2000–2009 and 2010–2019.

| Station                   | DJF            |          | MAM            |           | JJA            |          | SON            |         |
|---------------------------|----------------|----------|----------------|-----------|----------------|----------|----------------|---------|
|                           | Kendall $\tau$ | P-Value  | Kendall $\tau$ | P-Value   | Kendall $\tau$ | P-Value  | Kendall $\tau$ | P-Value |
| Precipitation (1990–1999) |                |          |                |           |                |          |                |         |
| Astore                    | -6.75e-02      | 0.007    | -1.06e-02      | 0.663     | -2.46e-02      | 0.327    | -2.40e-02      | 0.357   |
| Bunji                     | 4.34e-02       | 0.104    | 8.94e-02       | 0.000     | 4.04e-02       | 0.121    | 4.50e-02       | 0.091   |
| Chilas                    | 4.21e-02       | 0.114    | 4.48e-03       | 0.862     | 1.66e-02       | 0.524    | 1.16e-03       | 0.965   |
| Darosh                    | -9.16e-0       | 0.000    | -3.57e-02      | 0.140     | 2.14e-03       | 0.934    | 9.95e-03       | 0.702   |
| Gilgit                    | 2.46e-02       | 0.351    | 2.67e-02       | 0.289     | 6.03e-02       | 0.018    | -1.62e-02      | 0.539   |
| Gopis                     | -1.62e-03      | 0.951    | 4.77e-02       | 0.069     | 6.50e-02       | 0.014    | -6.71e-02      | 0.012   |
| Skardu                    | -3.37e-02      | 0.190    | 3.81e-02       | 0.133     | 7.15e-02       | 0.006    | 6.41e-02       | 0.016   |
| Precipitation (2000–2009) |                |          |                |           |                |          |                |         |
| Astore                    | -5.21e-02      | 0.044    | -1.02e-01      | 5.227e-05 | -4.62e-02      | 0.068    | -3.80e-02      | 0.146   |
| Bunji                     | 3.58e-02       | 0.180    | -1.20e-02      | 0.645     | 2.65e-02       | 0.307    | -3.15e-02      | 0.236   |
| Chilas                    | 1.22e-01       | 4.14e-06 | 4.03e-02       | 0.118     | 1.13e-01       | 1.52e-05 | 5.52e-02       | 0.038   |
| Darosh                    | 6.47e-02       | 0.011    | 2.31e-02       | 0.355     | -5.41e-02      | 0.038    | -3.77e-02      | 0.147   |
| Gilgit                    | 6.84e-02       | 0.009    | 1.31e-02       | 0.608     | -3.86e-02      | 0.127    | -2.61e-03      | 0.921   |
| Gopis                     | 5.69e-02       | 0.033    | -3.12e-02      | 0.234     | -8.10e-02      | 0.002    | -6.50e-02      | 0.015   |
| Skardu                    | 5.38e-02       | 0.037    | -1.41e-02      | 0.584     | -2.92e-02      | 0.254    | 8.34e-04       | 0.975   |
| Precipitation (2010–2019) |                |          |                |           |                |          |                |         |
| Astore                    | -1.30e-01      | 7.53e-06 | 1.34e-03       | 0.961     | -6.15e-03      | 0.828    | -3.59e-02      | 0.219   |
| Bunji                     | -3.37e-03      | 0.910    | -7.70e-03      | 0.787     | -1.60e-02      | 0.574    | -2.59e-02      | 0.379   |
| Chilas                    | 1.57e-01       | 9.5e-08  | -3.05e-02      | 0.286     | -1.18e-02      | 0.683    | -9.35e-02      | 0.001   |
| Darosh                    | 6.88e-03       | 0.812    | -1.27e-02      | 0.646     | -1.95e-02      | 0.502    | -4.89e-02      | 0.095   |
| Gilgit                    | -1.03e-02      | 0.728    | -3.62e-03      | 0.898     | -2.35e-02      | 0.401    | -6.59e-02      | 0.023   |
| Gopis                     | 4.52e-03       | 0.881    | 7.16e-02       | 0.014     | 6.73e-03       | 0.818    | -7.48e-03      | 0.802   |
| Skardu                    | -1.54e-01      | 1.98e-07 | 1.26e-02       | 0.66      | 4.69e-02       | 0.102    | -2.52e-02      | 0.395   |

<https://doi.org/10.1371/journal.pone.0271626.t006>

Fig 12 shows decreasing trend in precipitation extremes except CDD and WSDI in western and eastern parts. However, CWD, R10mm, R20mm, R25mm, R95 have increasing trends while CWD and PRECPTOT show decreasing trends in the eastern-central Karakoram.

## 5. Discussion

Zone 1 is rich with water resources (snow and glaciers). Therefore, the changes in climate and climate extremes may have significant impacts on water availability in dry summers, the frequency of flooding, and Glacier Lake Outburst Floods (GLOFs) in the future. Zone 2 comprise Monsoon dominated region receiving more than 60% precipitation during Monsoon season [77–79]. The seasonal changes in precipitation and temperature may affect the demand and supply of water and ultimately the crop's production. In addition, Zone 3 is the south-west part of Pakistan receiving low amount of rainfall round the year. Precipitation extremes may contribute less to cause flooding in the region. Zone 4 faces shortage of rainfall and have severe rainfall decrease, which can further exacerbate the shortage of water for drinking, agriculture and other purposes. Zone 5 is mainly comprised of Punjab province dominating the agriculture production of the country. According to our results, R99P has increasing trend in this region with the likelihood of intense rainfall and may cause flash flooding in the future.

As UIB is melt water dominated, therefore, the latest information of the cryosphere is important. In addition, changes in climate variables can significantly affect downstream

**Table 7. Seasonal MK test results in the Karakoram region for maximum temperature.** The table shows the Kendall  $\tau$  and their significance for the 1990–1999, 2000–2009 and 2010–2019.

| Station                         | DJF            |          | MAM            |          | JJA            |          | SON            |          |
|---------------------------------|----------------|----------|----------------|----------|----------------|----------|----------------|----------|
|                                 | Kendall $\tau$ | P-Value  | Kendall $\tau$ | P-Value  | Kendall $\tau$ | P-Value  | Kendall $\tau$ | P-Value  |
| Maximum Temperature (1990–1999) |                |          |                |          |                |          |                |          |
| Astore                          | 5.18e-02       | 0.021    | 9.51e-02       | 1.68e-05 | 9.22e-02       | 3.24e-05 | -3.05e-02      | 0.169    |
| Bunji                           | 8.52e-02       | 0.000    | 6.23e-02       | 0.005    | -1.41e-02      | 0.525    | -4.92e-02      | 0.027    |
| Chilas                          | 1.32e-01       | 3.35e-09 | 7.49e-02       | 0.001    | 9.76e-03       | 0.659    | -2.66e-02      | 0.232    |
| Darosh                          | 2.28e-01       | 2.2e-16  | 8.28e-02       | 0.000    | -6.26e-02      | 0.005    | -1.44e-02      | 0.515    |
| Gilgit                          | 1.40e-01       | 3.23e-10 | 8.06e-02       | 0.000    | 3.32e-03       | 0.881    | -2.45e-02      | 0.27     |
| Gopis                           | 1.81e-01       | 1.90e-15 | 7.74e-02       | 0.000    | -1.13e-01      | 4.14e-07 | -5.00e-02      | 0.025    |
| Skardu                          | 3.85e-02       | 0.084    | 7.03e-02       | 0.001    | -7.74e-02      | 0.000    | -7.57e-02      | 0.001    |
| Maximum Temperature (2000–2009) |                |          |                |          |                |          |                |          |
| Astore                          | -5.60e-02      | 0.012    | 9.88e-02       | 8.00e-06 | 6.90e-02       | 0.002    | -6.35e-02      | 0.004    |
| Bunji                           | -8.24e-02      | 0.000    | 3.46e-02       | 0.119    | -3.17e-02      | 0.156    | -8.61e-02      | 0.000    |
| Chilas                          | -1.08e-01      | 1.53e-06 | 4.33e-02       | 0.050    | -7.52e-03      | 0.735    | -6.58e-02      | 0.003    |
| Darosh                          | -9.40e-02      | 2.54e-05 | -1.08e-02      | 0.626    | -3.63e-02      | 0.101    | -8.58e-02      | 0.000    |
| Gilgit                          | -1.15e-01      | 3.1e-07  | 3.03e-02       | 0.171    | -2.59e-02      | 0.244    | -1.06e-01      | 2.01e-06 |
| Gopis                           | -1.17e-01      | 2.08e-07 | 5.18e-02       | 0.019    | 2.27e-03       | 0.919    | -7.33e-02      | 0.001    |
| Skardu                          | -1.13e-02      | 0.614    | 3.27e-02       | 0.139    | -1.47e-02      | 0.508    | -1.18e-01      | 1.11e-07 |
| Maximum Temperature (2010–2019) |                |          |                |          |                |          |                |          |
| Astore                          | 9.78e-02       | 0.000    | 9.92e-02       | 6.24e-05 | 9.77e-02       | 8.57e-05 | -3.85e-02      | 0.122    |
| Bunji                           | 1.33e-01       | 1.54e-07 | 6.51e-02       | 0.008    | 1.90e-02       | 0.446    | -8.71e-02      | 0.000    |
| Chilas                          | 1.01e-01       | 6.28e-05 | 8.18e-02       | 0.001    | 1.14e-01       | 4.30e-06 | -7.29e-02      | 0.003    |
| Darosh                          | 1.00e-01       | 5.67e-05 | 8.03e-02       | 0.001    | 6.04e-02       | 0.014    | -5.94e-02      | 0.016    |
| Gilgit                          | 3.87e-02       | 0.127    | 5.08e-02       | 0.041    | -1.30e-02      | 0.602    | -9.77e-02      | 9.50e-05 |
| Gopis                           | 9.21e-02       | 0.000    | 5.88e-02       | 0.018    | 1.17e-02       | 0.640    | -8.01e-02      | 0.001    |
| Skardu                          | 7.72e-02       | 0.002    | 8.19e-02       | 0.001    | 1.79e-02       | 0.4704   | -1.50e-01      | 1.58e-09 |

<https://doi.org/10.1371/journal.pone.0271626.t007>

water's availability for millions of inhabitants [44,80]. Most of the HKHs' glaciers are retreating since the mid-19<sup>th</sup> century [41,42,81]. In addition, some recent studies found that mass balance of the glaciers in the Karakoram are nearly in balance during 1971–2010 [41,82,83]. Muhammad et al. [76] derived the mass balance of glaciers in the sub-basins of UIB with negative mass balance except Shigar and Hunza in the central and western Karakoram, respectively. In another study, Muhammad et al. [84] investigated the mass balance of glaciers in Astore (a sub basin of UIB) and concluded that the glaciers in the basin (western Himalaya) are nearly in balance during 2000–2016 similar to the neighboring glaciers in the adjacent Karakoram. In addition to the direct glacier observations, climate data also show interesting signals and indirectly indicate glacier's health status. For instance, [44] noted that mean temperature decreased at the stations (Bunji, Gilgit and Skardu) lying in the Karakoram region during 1961–2000. Their analysis shows that a decrease of 1°C in mean summer temperature can cause a reduction of ~20% in summer runoff. Fowler and Archer [44] concluded an expansion in contrast to the widespread retreat in the remaining parts of the HKH region. Latif et al. [85] investigated trends in maximum, minimum temperature in the northern part of Pakistan. They observed that maximum temperature has mixed (upward and downward) trend while the cooling in minimum temperature become stronger in the recent past. Ali et al. [86] investigated temperatures' changes in the UIB by considering meteorological data for two stations. They noted that the mean temperature increased by 0.63°C in Skardu while decreased by

**Table 8. Seasonal MK test results in the Karakoram region for minimum temperature.** The table shows the Kendall  $\tau$  and their significance for the 1990–1999, 2000–2009 and 2010–2019.

| Station                         | DJF            |           | MAM            |          | JJA            |          | SON            |          |
|---------------------------------|----------------|-----------|----------------|----------|----------------|----------|----------------|----------|
|                                 | Kendall $\tau$ | P-Value   | Kendall $\tau$ | P-Value  | Kendall $\tau$ | P-Value  | Kendall $\tau$ | P-Value  |
| Minimum Temperature (1990–1999) |                |           |                |          |                |          |                |          |
| Astore                          | 3.60e-02       | 0.11      | 1.51e-01       | 8.73e-12 | 1.61e-01       | 4.38e-13 | -3.14e-04      | 0.989    |
| Bunji                           | -4.88e-02      | 0.030     | 7.85e-02       | 0.000    | 1.10e-03       | 0.960    | -4.94e-02      | 0.026    |
| Chilas                          |                |           | 1.12e-01       | 5.79e-07 | 1.41e-01       | 3.23e-10 | -7.65e-02      | 0.001    |
| Darosh                          | 1.13e-01       | 4.54e-07  | 1.03e-01       | 3.33e-06 | 6.64e-03       | 0.764    | -5.04e-02      | 0.023    |
| Gilgit                          | -1.56e-01      | 2.88e-12  | 9.95e-02       | 7.01e-06 | 4.19e-02       | 0.058    | -3.51e-02      | 0.114    |
| Gopis                           | 3.91e-02       | 0.086     | 1.05e-01       | 2.72e-06 | -3.01e-02      | 0.178    | -2.01e-02      | 0.368    |
| Skardu                          | -6.44e-02      | 0.004     | 9.08e-02       | 4.04e-05 | -1.24e-02      | 0.575    | -3.72e-02      | 0.094    |
| Minimum Temperature (2000–2009) |                |           |                |          |                |          |                |          |
| Astore                          | 2.76e-03       | 0.902     | 1.07e-01       | 1.56e-06 | 7.35e-02       | 0.001    | -7.00e-02      | 0.001    |
| Bunji                           | 7.40e-02       | 0.001     | 7.49e-02       | 0.001    | 1.13e-01       | 3.77e-07 | 5.98e-02       | 0.007    |
| Chilas                          | 1.59e-01       | 3.66e-12  | 8.46e-02       | 0.000    | 3.84e-02       | 0.089    | -3.69e-02      | 0.100    |
| Darosh                          | -1.91e-01      | 2.2e-16   | -5.36e-02      | 0.015    | -2.88e-01      | 2.2e-16  | -2.30e-01      | 2.2e-16  |
| Gilgit                          | 1.31e-01       | 5.39e-09  | 1.24e-01       | 2.61e-08 | 1.84e-01       | 2.2e-16  | 3.98e-02       | 0.074    |
| Gopis                           | -1.94e-01      | 2.2e-16   | 2.56e-02       | 0.250    | -6.04e-02      | 0.007    | -1.43e-01      | 1.46e-10 |
| Skardu                          | 1.05e-02       | 0.635     | -3.29e-03      | 0.882    | -1.48e-01      | 2.18e-11 | -1.51e-01      | 9.57e-12 |
| Minimum Temperature (2010–2019) |                |           |                |          |                |          |                |          |
| Astore                          | -9.41e-03      | 0.709     | 5.45e-02       | 0.028    | 1.23e-01       | 9.29e-07 | -1.08e-01      | 1.55e-05 |
| Bunji                           | 2.65e-01       | < 2.2e-16 | 1.41e-01       | 1.30e-08 | 1.62e-01       | 9.06e-11 | -7.09e-03      | 0.777    |
| Chilas                          | 1.18e-01       | 2.90e-06  | 9.01e-03       | 0.716    | -1.40e-01      | 1.66e-08 | -1.11e-01      | 8.16e-06 |
| Darosh                          | 1.31e-03       | 0.958     | -5.57e-03      | 0.822    | 1.57e-02       | 0.527    | -7.7e-02       | 0.001    |
| Gilgit                          | 8.88e-02       | 0.000     | 4.42e-02       | 0.078    | 1.23e-01       | 1.16e-06 | -9.07e-02      | 0.000    |
| Gopis                           | 2.13e-01       | < 2.2e-16 | 6.32e-02       | 0.012    | 2.14e-02       | 0.397    | -1.11e-01      | 1.05e-05 |
| Skardu                          | 1.08e-01       | 1.70e-05  | 4.59e-02       | 0.063    | 2.01e-02       | 0.418    | -4.81e-02      | 0.053    |

<https://doi.org/10.1371/journal.pone.0271626.t008>

– 0.137°C in Gilgit in the recent past. Shahzaman et al. [87] concluded in their study that drought has been observed over central and northern Pakistan during 1982–2019 by integrating various data types. Proportion of South Asian population exposed to heatwaves is increasing under the shared socioeconomic scenarios in the twenty first century, however, the northern areas of Pakistan are unaffected presently [88].

The mass balance of the glacier is heavily dependent on the winter accumulation and summer ablation strongly influenced by precipitation and temperature among other factors [89]. This study provides up to date changes in precipitation and temperature in some parts in the northern Pakistan (4 meteorological stations are in the Karakoram region). We found significant increase in winter average precipitation and decrease in summer average temperature particularly at the meteorological stations in the Karakoram region during the 1962–1990 (Table 1). However, the mMK test indicates a decreasing trend (during DJF) in precipitation and increasing trend (during JJA) in temperature in the recent period of 2010–2019 in the Karakoram which is not aligned with the Karakoram Anomaly. Our findings are an indication of glaciers mass loss in future in the Karakoram region. These stations are situated in the valley below the glacier terminating zones, however, an indirect clue can be inferred based on climate change and extreme events regarding future trends. Our results suggest further investigation of glaciers mass balance in the region in future for better understanding of glaciers’ health and associated impacts. The downstream water availability in UIB is dominated by snow and

| Zone/V<br>ariable | Temperatures' Extremes |        |        |        |        |        |              |              |        |        |        |        |        |        |        |        |        |
|-------------------|------------------------|--------|--------|--------|--------|--------|--------------|--------------|--------|--------|--------|--------|--------|--------|--------|--------|--------|
|                   | Duration               | DTR    | FD0    | GSL    | ID0    | SU25   | TMAX<br>mean | TMIN<br>mean | TN10P  | TN90P  | TNN    | TNX    | TR20   | TX10P  | TX90P  | TXN    | TXC    |
| Astore            | 1962-1990              | Green  | Orange | Orange | Orange | Blue   | Orange       | Orange       | Orange | Orange | Blue   | Blue   | Orange | Orange | Orange | Blue   | Orange |
|                   | 1991-2019              | Orange | Blue   | Orange | Blue   | Orange | Orange       | Orange       | Blue   | Orange | Orange | Orange | Orange | Blue   | Orange | Orange | Orange |
| Bunji             | 1962-1990              | Orange | Orange | Blue   | Green  | Orange | Blue         | Blue         | Orange | Blue   | Blue   | Blue   | Orange | Orange | Blue   | Orange | Blue   |
|                   | 1991-2019              | Blue   | Blue   | Blue   | Green  | Orange | Orange       | Orange       | Blue   | Orange | Orange | Orange | Orange | Blue   | Orange | Orange | Orange |
| Chilas            | 1962-1990              | Orange | Orange | Blue   | Green  | Orange | Orange       | Blue         | Orange | Blue   | Blue   | Blue   | Orange | Orange | Blue   | Orange |        |
|                   | 1991-2019              | Orange | Orange | Orange | Green  | Orange | Orange       | Orange       | Blue   | Orange | Blue   | Blue   | Blue   | Blue   | Orange | Blue   |        |
| Darosh            | 1962-1990              | Orange | Orange | Blue   | Green  | Orange | Blue         | Blue         | Orange | Blue   | Blue   | Blue   | Orange | Orange | Blue   | Orange |        |
|                   | 1991-2019              | Orange | Orange | Blue   | Green  | Orange | Orange       | Blue         | Orange | Blue   | Blue   | Blue   | Blue   | Orange | Orange | Blue   |        |
| Gilbit            | 1962-1990              | Orange | Blue   | Orange | Green  | Orange | Blue         | Blue         | Orange | Blue   | Blue   | Blue   | Orange | Orange | Blue   | Orange |        |
|                   | 1991-2019              | Blue   | Blue   | Orange | Green  | Orange | Orange       | Blue         | Orange | Orange | Blue   | Blue   | Orange | Orange | Blue   | Orange |        |
| Gupis             | 1962-1990              | Orange | Orange | Blue   | Blue   | Orange | Blue         | Blue         | Orange | Blue   | Blue   | Blue   | Orange | Orange | Blue   | Orange |        |
|                   | 1991-2019              | Orange | Blue   | Orange | Blue   | Orange | Orange       | Orange       | Blue   | Orange | Blue   | Blue   | Blue   | Blue   | Orange | Blue   |        |
| Skardu            | 1962-1990              | Orange | Orange | Orange | Blue   | Orange | Orange       | Blue         | Orange | Blue   | Blue   | Blue   | Orange | Orange | Blue   | Orange |        |
|                   | 1991-2019              | Green  | Blue   | Blue   | Blue   | Blue   | Blue         | Blue         | Blue   | Blue   | Blue   | Blue   | Blue   | Blue   | Blue   | Blue   |        |

|  |                                   |  |                                 |
|--|-----------------------------------|--|---------------------------------|
|  | <i>Insignificantly decreasing</i> |  | <i>Significantly decreasing</i> |
|  | <i>Insignificantly increasing</i> |  | <i>Significantly increasing</i> |

**Fig 11. Station-wise climate extremes related to temperature for each climatic zone and two independent time duration in Karakoram region.** Each color has specific meaning and given with Fig 12. Note: The colors represent different status for each extreme mentioned in these figures. Green color shows no changes.

<https://doi.org/10.1371/journal.pone.0271626.g011>

glacier melt water particularly in summer, therefore, the climate change assessment can indicate indirect signals for water availability. In addition, climate extremes can provide guidelines to policy makers and relevant stakeholder for future climate trends and meltwater resources in the country.

### 6. Conclusions

During DJF and MAM, average temperature increased in all climate zones. A decreasing trend during JJA in zone 1, 3, 4 and during SON in zones 1 and 2 were noted in the average temperature. Precipitation indicated mixed trend in different zones. Mann-Kendal test indicated trend in maximum and minimum temperature except zone-4 where the maximum temperature has no trend. On the average, CWDs increased in all zones except in zone 3 where it decreased. The number of SU25 increased in all climate zone except zone 4.

| Zone/V<br>variable | Duration  | Precipitations' Extremes |        |        |         |        |        |        |        |        |            |            |        |        |
|--------------------|-----------|--------------------------|--------|--------|---------|--------|--------|--------|--------|--------|------------|------------|--------|--------|
|                    |           | CDD                      | CSDI   | CWD    | PRCPTOT | R10mm  | R20mm  | R25mm  | R95    | R99p   | RX1da<br>y | RX5da<br>y | SDII   | WSDI   |
| Astore             | 1962-1990 | Orange                   | Orange | Blue   | Orange  | Orange | Orange | Orange | Blue   | Blue   | Blue       | Blue       | Orange | Orange |
|                    | 1991-2019 | Orange                   | Blue   | Blue   | Blue    | Blue   | Blue   | Blue   | Blue   | Blue   | Blue       | Blue       | Blue   | Blue   |
| Bunji              | 1962-1990 | Blue                     | Orange | Orange | Orange  | Orange | Orange | Orange | Orange | Orange | Orange     | Orange     | Orange | Orange |
|                    | 1991-2019 | Orange                   | Blue   | Orange | Orange  | Orange | Orange | Orange | Blue   | Blue   | Blue       | Blue       | Blue   | Orange |
| Chilas             | 1962-1990 | Blue                     | Orange | Orange | Orange  | Blue   | Orange | Orange | Orange | Blue   | Blue       | Blue       | Blue   | Blue   |
|                    | 1991-2019 | Blue                     | Orange | Orange | Orange  | Orange | Orange | Orange | Blue   | Blue   | Blue       | Blue       | Blue   | Orange |
| Darosh             | 1962-1990 | Orange                   | Orange | Blue   | Blue    | Blue   | Blue   | Blue   | Blue   | Blue   | Blue       | Blue       | Blue   | Blue   |
|                    | 1991-2019 | Blue                     | Orange | Blue   | Blue    | Blue   | Blue   | Blue   | Blue   | Orange | Blue       | Blue       | Blue   | Orange |
| Gilgit             | 1962-1990 | Orange                   | Blue   | Orange | Orange  | Orange | Orange | Orange | Orange | Orange | Blue       | Blue       | Orange | Orange |
|                    | 1991-2019 | Blue                     | Blue   | Orange | Orange  | Orange | Orange | Orange | Blue   | Blue   | Orange     | Orange     | Blue   | Blue   |
| Gupis              | 1962-1990 | Orange                   | Orange | Blue   | Blue    | Blue   | Blue   | Blue   | Blue   | Blue   | Blue       | Blue       | Orange | Orange |
|                    | 1991-2019 | Blue                     | Blue   | Blue   | Blue    | Blue   | Blue   | Blue   | Blue   | Blue   | Blue       | Blue       | Blue   | Blue   |
| Skardu             | 1962-1990 | Blue                     | Orange | Orange | Orange  | Orange | Orange | Orange | Orange | Orange | Orange     | Orange     | Orange | Orange |
|                    | 1991-2019 | Orange                   | Blue   | Blue   | Blue    | Orange | Orange | Orange | Orange | Orange | Orange     | Orange     | Orange | Blue   |

|  |                                   |  |                                 |
|--|-----------------------------------|--|---------------------------------|
|  | <i>Insignificantly decreasing</i> |  | <i>Significantly decreasing</i> |
|  | <i>Insignificantly increasing</i> |  | <i>Significantly increasing</i> |

**Fig 12. Station-wise climate extremes related to precipitation for each climatic zone and two independent time duration In Karakoram region.** Each color has specific meaning and given below. *Note: The colors represent different status for each extreme mentioned in these figures. Green color shows no changes.*

<https://doi.org/10.1371/journal.pone.0271626.g012>

In the Karakoram region, temperature decreased significantly during JJA. Also, precipitation increased significantly in this region except a significant decrease in Gilgit during DJF. MK test suggested increasing trend in precipitation and decreasing trend in maximum and minimum temperature during 1962–1990 and closely in line with Karakoram Anomaly. However, precipitation (in DJF) and temperature (in JJA) have decreasing and increasing trend, respectively, during the most recent period (2010–2019), which do not support the notion of Karakoram Anomaly. These findings suggested that the glacier may lose mass in future rather than gaining or stable conditions. Climate extremes have mixed trends over North Pakistan. For instance, summer days increased, and cold nights have mixed trend. Warm nights decreased except in western Karakoram.

The key takeaways are:

1. A change is noted in the Climate (maximum, minimum temperature and precipitation) across the country during the analysis period.

2. TN10p, TX10p and TR20, CSDI and PRECPTOT have decreasing trend particularly during the 1991–2019 in most parts of the country.
3. Precipitation has increasing trend in DJF while temperature has decreasing trend in JJA during the 1962–1990 at the stations located in the Karakoram region.
4. During the last decade (2010–2019), precipitation and temperature have decreasing and increasing trend, respectively, at the stations located in the Karakoram region.
5. Based on the points in 3 and 4, the glaciers in the Karakoram region may loses mass balance slightly in the near future, which is in contrast to the famous Karakoram Anomaly.

## Supporting information

### S1 Data.

(XLSX)

## Acknowledgments

The authors are grateful to Pakistan Meteorological Department (PMD) for providing meteorological data.

## Author Contributions

**Conceptualization:** Firdos Khan.

**Data curation:** Firdos Khan, Sher Muhammad.

**Formal analysis:** Firdos Khan.

**Investigation:** Firdos Khan.

**Methodology:** Christoph Mayer.

**Software:** Firdos Khan, Shaukat Ali.

**Visualization:** Firdos Khan, Hamd Ullah.

**Writing – original draft:** Firdos Khan.

**Writing – review & editing:** Shaukat Ali, Christoph Mayer, Hamd Ullah, Sher Muhammad.

## References

1. Hegerl, G.C., et al., 2010. Good practice guidance paper on detection and attribution related to anthropogenic climate change. In: Stocker, T. G., et al. (Eds.), Meeting report of the Intergovernmental Panel on Climate Change Expert Meeting on Detection and Attribution of Anthropogenic Climate Change. IPCC Working Group I Technical Support Unit, University of Bern, Bern, Switzerland, p.8pps.
2. Bindoff, N., Stott, P., Achuta Rao, K. M., Allen, M., Gillett, N., Gutzler, D., et al., 2013. Detection and attribution of climate change: from global to regional in: climate change 2013. In: Stocker, T. F., Qin, D., Plattner, G.-K., Tignor, M., Allen, S. K., Boschung, J., Nauels, A., Xia, Y., Bex, V., Midgley, P. M. (Eds.), The Physical Science Basis. Contribution of Working Group I to the Fifth Assessment. Cambridge University Press, Cambridge, United Kingdom, New York, NY, USA.
3. Walsh J., Wuebbles D., Hayhoe K., Kossin J., Kunkel K., Stephens G., et al., 2014a. Ch. 2: Our Changing Climate. Climate Change Impacts in the United States: The Third National Climate Assessment. In: Melillo J. M., Richmond Terese (T.C.), Yohe G. W. (Eds.), U. S. Global Change Research Program, United States 2-1-2-nn.
4. Walsh K.J.E., Camargo S., Vecchi G., Daloz A.S., Elsner J., Emanuel K., et al, 2014b. Hurricanes and climate: the U. S. CLIVAR working group on hurricanes. Bull. Am. Meteor. Soc. <https://doi.org/10.1175/BAMS-D-13-00242.1>.

5. Easterling A. R., Kunkel K. E., Wehner M. E., Sun L., 2016. Detection and attribution of climate extremes in the observed record. *Weather and Climate Extremes* 11, Pp.17–27. <https://doi.org/10.1016/j.wace.2016.01.001>
6. Intergovernmental Panel on Climate Change (IPCC), 6th Assessment Report (2021). URL: <https://www.ipcc.ch/report/ar6/wg1/> (accessed on 28 January 2022).
7. Schweikert A., Chinowsky P., Espinet X., Tarbert M. (2014) Climate Change and Infrastructure Impacts: Comparing the Impact on Roads in ten Countries through 2100. *Procedia Engineering*, Volume 78, Pages 306–316. <https://doi.org/10.1016/j.proeng.2014.07.072>.
8. Forzieri G., Bianchi A., Silva FB., Herrera MAM., Leblois A., Lavalle C., et al. (2018) Escalating impacts of climate extremes on critical infrastructures in Europe. *Global Environmental Change*, Volume 48, Pages 97–107. <https://doi.org/10.1016/j.gloenvcha.2017.11.007> PMID: 29606806
9. National Oceanic and Atmospheric Administration: Climate change impacts. URL: <https://www.noaa.gov/education/resource-collections/climate/climate-change-impacts/> accessed on 19 January 2022.
10. Cheng C.S., Auld H., Li Q., Li G., 2012. Possible impacts of climate change on extreme weather events at local scale in south-central Canada. *Clim. Chang.*, Vol. 112, Pp. 963–979.
11. Sillmann J., Kharin V.V., Zwiers F.W., Zhang X., Bronaugh D., 2013 Climate extremes indices in the CMIP5 multimodel ensemble: Part 2. Future climate projections. *J. Geophys. Res. Atmos.*, Vol. 118, Pp. 2473–2493.
12. Zhang Q., Gu X., Singh V.P., Kong D., Chen X., 2015. Spatiotemporal behavior of floods and droughts and their impacts on agriculture in China. *Glob. Planet. Chang.*, Vol. 131, Pp. 63–72.
13. Sun Q., Miao C., Duan Q., Wang Y., 2015. Temperature and precipitation changes over the Loess Plateau between 1961 and 2011, based on high-density gauge observations. *Glob. Planet. Chang.*, Vol. 132, Pp. 1–10.
14. Moazami S., Golian S., Hong Y., Sheng C., Kavianpour M.R., 2016. Comprehensive evaluation of four high-resolution satellite precipitation products under diverse climate conditions in Iran. *Hydrol. Sci. J.*, Vol. 61, Pp. 420–440.
15. Berardy A., Chester M.V., 2017. Climate change vulnerability in the food, energy, and water nexus: Concerns for agricultural production in Arizona and its urban export supply. *Environ. Res. Lett.*, Vol. 12, 35004.
16. Girma A., Qin T., Wang H., Yan D., Gedefaw M., Abiyu A., Batsuren D. (2020). Study on Recent Trends of Climate Variability Using Innovative Trend Analysis: The Case of the upper Huai River Basin. *Polish Journal of Environmental Studies*, Vol. 29, No. 3, Pp. 2199–2210. <https://doi.org/10.15244/pjoes/103448>.
17. Bougara H., Hamed KB, Borgemeister C., Tischbein B., Kumar N. (2020) Analyzing Trend and Variability of Rainfall in The Tafna Basin (Northwestern Algeria). *Atmosphere*, Vol. 11, No. 4. <https://doi.org/10.3390/atmos11040347>.
18. Asfaw A., Simane B., Hassen A., Bantider A. (2018) Variability and time series trend analysis of rainfall and temperature in northcentral Ethiopia: A case study in Woleka sub-basin, *Weather and Climate Extremes*, Vol/ 19, Pp. 29–41. <https://doi.org/10.1016/j.wace.2017.12.002>.
19. Koudahe K., Kayode A.J., Samson A.O., Adebola A.A. and Djaman K. (2017) Trend Analysis in Standardized Precipitation Index and Standardized Anomaly Index in the Context of Climate Change in Southern Togo. *Atmospheric and Climate Sciences*, 7, 401–423. <https://doi.org/10.4236/acs.2017.74030>.
20. Patel GT., Libang A. (2014) Trend analysis of annual and seasonal rainfall to climate variability in North-East region of India. *Journal of Applied and Natural Science* 6 (2): PP. 480–483.
21. Shi P., Ma X., Chen X., Qu S., Zhang Z. (2013) Analysis of Variation Trends in Precipitation in an Upstream Catchment of Huai River", *Mathematical Problems in Engineering*, vol. 2013, Article ID 929383, 11 pages, 2013. <https://doi.org/10.1155/2013/929383>.
22. Michaels PJ., Balling RC Jr., Vose RS., Knappenberger PC. (1998) Analysis of trends in the variability of daily and monthly historical temperature measurements. *Climate Research*, Vol. 10, Pp. 10–33.
23. Rathnayake U. (2019) Comparison of Statistical Methods to Graphical Methods in Rainfall Trend Analysis: Case Studies from Tropical Catchments. *Advances in Meteorology*, vol. 2019, Article ID 8603586. <https://doi.org/10.1155/2019/8603586>.
24. Kaur N., Yousuf A., Singh MJ. (2021) Long term rainfall variability and trend analysis in lower Shivaliks of Punjab, India. *MAUSAM*, Vol. 72, No. 3, Pp. 571–582.
25. Alam F., Salam M., Khalil N.A. et al. (2021) Rainfall trend analysis and weather forecast accuracy in selected parts of Khyber Pakhtunkhwa, Pakistan. *SN Appl. Sci.* 3, 575. <https://doi.org/10.1007/s42452-021-04457-z>.



26. Hussain A., Cao J., Hussain I., Begum S., Akhtar M., Wu X., et al. (2021) Observed Trends and Variability of Temperature and Precipitation and Their Global Teleconnections in the Upper Indus Basin, Hindu-kush-Karakoram-Himalaya. *Atmosphere*, 12, 973. <https://doi.org/10.3390/atmos12080973>.
27. Safdar F., Khokhar MF., Arshad M., Adil IH. (2019) Climate Change Indicators and Spatiotemporal Shift in Monsoon Patterns in Pakistan. *Advances in Meteorology*, Volume 2019, Article ID 8281201, <https://doi.org/10.1155/2019/8281201>.
28. Samo SR., Bhatti NK., Sannd A., Keerio MA., Bangwar DK. (2017) Temporal Analysis of Temperature and Precipitation Trends in Shaheed Benazir Abad Sindh, Pakistan. *Engineering, Technology & Applied Science Research* Vol. 7, No. 6, PP. 2171–2176.
29. Abbas F. (2013) Analysis of a Historical (1981–2010) Temperature Record of the Punjab Province of Pakistan. *Earth Interactions*, Vol. 17, Pp. 1–23. <https://doi.org/10.1175/2013EI000528.1>.
30. Rahman G., Rahman A., Anwar MM., Muhammad Dawood M., Miandad M. (2022) Spatio-temporal analysis of climatic variability, trend detection, and drought assessment in Khyber Pakhtunkhwa, Pakistan. *Arabian Journal of Geosciences*. <https://doi.org/10.1007/s12517-021-09382-4>.
31. Felix M.L.; Kim Y.-k.; Choi M.; Kim J.-C.; Do X.K.; Nguyen T.H.; et al (2021) Detailed Trend Analysis of Extreme Climate Indices in the Upper Geum River Basin. *Water*, 13, 3171. <https://doi.org/10.3390/w13223171>.
32. Mahmood R., Jia S. & Zhu W. (2018) Analysis of climate variability, trends, and prediction in the most active parts of the Lake Chad basin, Africa. *Sci Rep* 9, 6317. <https://doi.org/10.1038/s41598-019-42811-9>.
33. Sun O., Zhang X., Zwiers F., Westra S., Alexandra LV. (2021) A Global, Continental, and Regional Analysis of Changes in Extreme Precipitation. *Journal of Climate*, Vol. 34, Issue 1, Pp. 243–258. <https://doi.org/10.1175/JCLI-D-19-0892.1>.
34. Frich P., Alexander LV., Della-Marta P., Gleason B., Haylock M., Klein Tank AMG., et al. (2002) Observed coherent changes in climatic extremes during the second half of the twentieth century. *Climate Research*, 19, 193–212. <https://doi.org/10.3354/cr019193>.
35. Sheikh M.M., Manzoor N., Ashraf J., Adnan M., Collins D., Hameed S., et al., 2015. Trends in extreme daily rainfall and temperature indices over South Asia. *Int. J. Climatol.*, Vol. 35, No. 7, Pp. 1625–1637.
36. Rizvi FF., Ahmed B., Hussain S., Khan A., Raza M., Shahid M. (2021) Assessment of climate extremes from historical data (1960–2013) of Soan River Basin in Pakistan. *International Journal of Global Warming*, 2021 Vol. 25 No.1, pp.1 – 37. <https://doi.org/10.1504/IJGW.2021.117431>
37. Pritchard H.D., 2019. Asia's shrinking glaciers protect large populations from drought stress. *Nature* 569, 649–654. <https://doi.org/10.1038/s41586-019-1240-1> PMID: 31142854
38. Lutz A.F., Immerzeel W.W., Kraaijenbrink P.D.A., Shrestha A.B., Bierkens M.F.P., 2016. Climate Change Impacts on the Upper Indus Hydrology: Sources, Shifts and Extremes. *PLoS ONE* 11(11): e0165630. <https://doi.org/10.1371/journal.pone.0165630> PMID: 27828994
39. Haeberli W., Frauenfelder R., Hoelzle M., Maisch M., 1999. On rates and acceleration trends of global glacier mass changes. *Geografiska Annaler* 81A(4):585–591. <https://doi.org/10.1111/1468-0459.00086>.
40. Zemp M., Paul F., Hoelzle M., Haeberli W., 2008. Glacier fluctuations in the European Alps 1850–2000: an overview and spatiotemporal analysis of available data. In: Orlove B, Wiegandt E, Luckman BH (eds) *The darkening peaks: Glacial retreat in scientific and social context*. University of California Press, pp 152–167. <https://doi.org/10.5167/uzh-9024>
41. Brun F., Berthier E., Wagnon P., Kääb A., Treichler D., 2017. A spatially resolved estimate of High Mountain Asia glacier mass balances, 2000–2016. *Nat Geosci.*, 10(9): 668–673. <https://doi.org/10.1038/NGEO2999> PMID: 28890734
42. Kääb A., Treichler D., Nuth C., Berthier E., 2015. Brief Communication: Contending estimates of 2003–2008 glacier mass balance over the Pamir–Karakoram–Himalaya. *The Cryosphere*, 9, 557–564. <https://doi.org/10.5194/tc-9-557-2015>
43. Hewitt K., 2005. The Karakoram anomaly? Glacier expansion and the 'elevation effect', Karakoram Himalaya. *Mt. Res. Dev.* 25, 332–340.
44. Fowler H.J., Archer D.R., 2006. Conflicting Signals of Climatic Change in the Upper Indus Basin. *Journal of Climate*, Vol. 19, No. 17, Pp. 4276–4293. <https://doi.org/10.1175/JCLI3860.1>.
45. Iyakaremye V., Zeng G., Yang X., Zhang G., Ullah I., Gahigi A., et al. (2021) Increased high-temperature extremes and associated population exposure in Africa by the mid-21st century. *Science of the Total Environment* 790, 148162. <https://doi.org/10.1016/j.scitotenv.2021.148162> PMID: 34102437
46. Iyakaremye V., Zeng G., Ullah I., Gahigi A., Mumo R., Ayugi B. (in press) Recent Observed Changes in Extreme High-Temperature Events and Associated Meteorological Conditions over Africa. *International journal of climatology*. <https://doi.org/10.1002/joc.7485>.

47. Ahmad B., Hussain A. (2017) Evaluation of Past and Projected Climate Change in Pakistan Region Based on GCM20 and RegCM4.3 Outputs. *Pakistan Journal of Meteorology* Vol. 13, No. 26.
48. Khan F., Pilz J., Ali S., (2017) Improved hydrological projections and reservoir management in the Upper Indus Basin under the changing climate. *Water and environment journal*, 31 (2), 235–244. <https://doi.org/10.1111/wej.12237>
49. Worldometers. URL: <https://www.worldometers.info/world-population/pakistan-population/> (access on 18 April 2021).
50. Pakistan Bureau of Statistics (2021). URL: <https://www.pbs.gov.pk/> (Accessed on 20 May 2021).
51. The World Bank (2021). URL: <https://data.worldbank.org/indicator/SP.POP.TOTL?locations=PK> (Accessed on 20 May 2020).
52. Azur M.J., Stuart E.A., Frangakis C., Leaf P.J., 2011. Multiple imputation by chained equations: what is it and how does it work? *Int. J. Methods Psychiatr. Res.* 20(1): Pp. 40–49. <https://doi.org/10.1002/mpr.329> PMID: 21499542
53. Tuomenvirta H. (2002). Homogeneity testing and adjustment of climatic time series in Finland. *Geophysics*, 38(1–2), 15–41.
54. Ullah W., Wang G., Ali G., Tawia Hagan D., Bhatti A., Lou D. (2019b) Comparing multiple precipitation products against in-situ observations over different climate regions of Pakistan. *Rem. Sens.* 11 (6), 628. <https://doi.org/10.3390/rs11060628>.
55. Arshad M., Ma X., Yin J., Ullah W., Liu M., Ullah I. (2021) Performance evaluation of ERA-5, JRA-55, MERRA-2, and CFS-2 reanalysis datasets, over diverse climate regions of Pakistan. *Weather and Climate Extremes*, vol. 33, 100373. <https://doi.org/10.1016/j.wace.2021.100373>.
56. Ullah I., Ma X., Yin J., Asfaw T. G., Azam K., Syed S., et al. (2021) Evaluating the meteorological drought characteristics over Pakistan using in situ observations and reanalysis products. *International journal of climatology*, Vol. 41, No. 9, Pp. 4437–4459. <https://doi.org/10.1002/joc.7063>.
57. Ullah I., Ma X., Yin J., Saleem F., Syed S., Omer A., et al. (2022) Observed changes in seasonal drought characteristics and their possible potential drivers over Pakistan. *International journal of climatology*, Vol. Vol. 42, No. 3, Pp. 1576–1596. <https://doi.org/10.1002/joc.7321>.
58. Ho Ming K., & Yusof F. (2012). Homogeneity Tests on Daily Rainfall Series in Peninsular Malaysia. *Int. Journal of Contemporary Mathematics and Sciences*, 7(1), 9–22.
59. Mann H.B., 1945. Nonparametric tests against trend. *Econometrica* 13(3):245–259.
60. Shaukat M.H., Al-Dousari A., Hussain I., Faisal M., Ismail M., Shoukry A.M., et al., 2020. Evaluation of wet and dry event's trend and instability based on the meteorological drought index. *PeerJ* 8:e9729. <https://doi.org/10.7717/peerj.9729> PMID: 32904207
61. Hu M., Sayama T., TRY S., Takara K., Tanaka K., 2019. Trend Analysis of Hydroclimatic Variables in the Kamo River Basin, Japan. *Water*, Vol. 11, No. 9. <https://doi.org/10.3390/w11091782>
62. Hirsch R.M., Slack J.R., Smith R.A., 1982. Techniques of trend analysis for monthly water quality data. *Water Resources Research* 18(1):107–121.
63. Zhang X., Hegerl G., Zwiers F.W., Kenyon J., 2005. Avoiding Inhomogeneity in Percentile-Based Indices of Temperature Extremes. *Journal of Climate*, pages 1641–1651. <https://doi.org/10.1175/JCLI3366.1>.
64. Expert Team on Detection of Climate Change and Indices (ETDCCI). URL: [http://etccdi.pacificclimate.org/list\\_27\\_indices.shtml](http://etccdi.pacificclimate.org/list_27_indices.shtml) (accessed on 17 October 2021).
65. Quincey D. J., Copland L., Mayer C., Bishop M., Luckman A., Belò M. (2009) Ice velocity and climate variations for Baltoro Glacier, Pakistan. *Journal of Glaciology*, Vol. 55, No. 194, Pp. 1061–1071. <https://doi.org/10.3189/002214309790794913>.
66. BOLCH T., KULKARNIA A., KÄÄB A., HUGGEL C., PAUL F., COGLEY J. G., et al. (2012) The State and Fate of Himalayan Glaciers. *Science*, VOL. 336, NO. 6079, Pp. 310–314 • <https://doi.org/10.1126/science.1215828> PMID: 22517852
67. Kalair A. R., Abas N., Hasan Q. U., Kalair E., Kalair A., Khan N. (2019) Water, energy and food nexus of Indus Water Treaty: Water governance. *Water-Energy Nexus*, Vol. 2, No 1, Pp. 10–24. <https://doi.org/10.1016/j.wen.2019.04.001>.
68. Bhatti A. S., Wang G., Ullah W., Ullah S. et al. (2020) Trend in Extreme Precipitation Indices Based on Long Term In Situ Precipitation Records over Pakistan. *Water*, 12, 797. <https://doi.org/10.3390/w12030797>
69. Ullah S., You Q., Ullah W. et al. (2019) Daytime and nighttime heat wave characteristics based on multiple indices over the China–Pakistan economic corridor. *Climate Dynamics*, Vol. 53, Pp. 6329–6349. <https://doi.org/10.1007/s00382-019-04934-7>.
70. Ullah S., You Q., Ullah W., Ali A. (2018) Observed changes in precipitation in China-Pakistan economic corridor during 1980–2016. *Atmospheric Research*, Vol. 210, Pp. 1–14. <https://doi.org/10.1016/j.atmosres.2018.04.007>.

71. Khan I., Waqas T., Samiullah, Ullah S. (2020) Precipitation variability and its trend detection for monitoring of drought hazard in northern mountainous region of Pakistan. *Arabian Journal Geosciences*, Vol. 13, 698. <https://doi.org/10.1007/s12517-020-05700-4>.
72. Ullah S., You Q., Ali A., Ullah W., Jan M. A., Zhang Y., et al. (2018) Observed changes in maximum and minimum temperatures over China- Pakistan economic corridor during 1980–2016. *Atmospheric Research*, Vol. 216, Pp. 37–51. <https://doi.org/10.1016/j.atmosres.2018.09.020>.
73. Ullah S., You Q., Ullah W., Ali A., Xie W., Xie X. (2019) Observed changes in temperature extremes over China–Pakistan Economic Corridor during 1980–2016. *International journal of climatology*, Vol. 39, N. 3, Pp. 1457–1475. <https://doi.org/10.1002/joc.5894>
74. Archer D. (2003) 'Contrasting hydrological regimes in Indus Basin', *Journal of Hydrology*, Vol. 274, Nos. 1–4, pp.198–201.
75. Muhammad S., & Tian L. (2016). Changes in the ablation zones of glaciers in the western Himalaya and the Karakoram between 1972 and 2015. *Remote Sensing of Environment*, 187, 505–512.
76. Muhammad S., Tian L., & Khan A. (2019b). Early twenty-first century glacier mass losses in the Indus Basin constrained by density assumptions. *Journal of Hydrology*, 574, 467–475.
77. Mahmood T., Rasul G., 2012. Predictability of Summer Monsoon Rainfall by using High Resolution Regional Model (HRM). *Pakistan Journal of Meteorology*, Vol. 9, Issue 17, Pp. 25–36.
78. Khan F., Ali S., Pilz J., 2018. Evaluation of statistical downscaling models using pattern and dependence structure in the monsoon-dominated region of Pakistan. Volume 73, Issue 6 Pages 193–203 <https://doi.org/10.1002/wea.3164>.
79. Ali S., Kiani R.S., Babar R., Nasir S., Rehman N., Adnan M., et al., 2020. Spatio-Temporal Variability of Summer Monsoon Onset over Pakistan. *Asia-Pacific Journal of Atmospheric Sciences* volume 56, pages147–172. <https://doi.org/10.1007/s13143-019-00130-z>.
80. Immerzeel W.W., Lutz A.F., Andrade M., Bahl A., Biemans H., Bolch T., et al., 2020. Importance and vulnerability of the world's water towers. *Nature*, Vol. 577, Pp. 364–369. <https://doi.org/10.1038/s41586-019-1822-y> PMID: 31816624
81. Bolch T., Shea J.M., Liu S., Azam F.M., Gao Y., Gruber S., et al., 2019. Status and Change of the Cryosphere in the Extended Hindu Kush Himalaya Region. In: Wester P., Mishra A., Mukherji A., Shrestha A. (eds) *The Hindu Kush Himalaya Assessment*. Springer, Cham. [https://doi.org/10.1007/978-3-319-92288-1\\_7](https://doi.org/10.1007/978-3-319-92288-1_7).
82. Bolch T., Kulkarni A., Kääb A., Huggel C., Paul F., Cogley J.G., et al., 2012. The State and Fate of Himalayan Glaciers. *Science*, Vol. 336, Issue 6079, pp. 310–314. <https://doi.org/10.1126/science.1215828> PMID: 22517852
83. Zhou Y., Li Z., Li J., 2017. Slight glacier mass loss in the Karakoram region during the 1970s to 2000 revealed by KH-9 images and SRTM DEM. *Journal of Glaciology*, 63(238) 331–342. <https://doi.org/10.1017/jog.2016.142>
84. Muhammad S., Tian L., Nüsser M., (2019c) No significant mass loss in the glaciers of Astore Basin (North-Western Himalaya), between 1999 and 2016. *Journal of Glaciology*, 65(250) 270–278. <https://doi.org/10.1017/jog.2019.5>
85. Latif Y., Yaoming M., Yaseen M., Muhammad S., Muhammad A.W., 2020b. Spatial analysis of temperature time series over Upper Indus Basin (UIB). *Theor Appl Climatol* 139:741–758. <https://doi.org/10.1007/s00704-019-02993>.
86. Ali S.H.B., Shafqat M.N., Eqani S.A.M.A.S., Shah S.T.A., 2019. Trends of climate change in the upper Indus basin region, Pakistan: implications for cryosphere. *Environ Monit Assess* (2019) 191: 51. <https://doi.org/10.1007/s10661-018-7184-3> PMID: 30612331
87. Shahzaman M., Zhu W., Ullah I., Mustafa F., Bilal M., Ishfaq S., et al. (2021) Comparison of Multi-Year Reanalysis, Models, and Satellite Remote Sensing Products for Agricultural Drought Monitoring over South Asian Countries. *Remote Sens.* 2021, 13, 3294. <https://doi.org/10.3390/rs13163294>.
88. Ullah I., Saleem F., Iyakaremye V., Yin J., Ma X., Syed S., et al. (2022) Projected Changes in Socioeconomic Exposure to Heatwaves in South Asia Under Changing Climate. *Earth's Future*, Vol. 10, No. 2, e2021EF002240. <https://doi.org/10.1029/2021EF002240>.
89. Guo H.D., Zhang L. Zhu L.W., 2015. Earth observation big data for climate change research. *Advances in Climate Change Research*, Volume 6, Issue 2, Pages 108–117. <https://doi.org/10.1016/j.accre.2015.09.007>.
